# Supplementary material for: Evaluation of human-papillomavirus screening for cervical cancer in China’s rural population
Source: PeerJ. 2019 Dec 20;7:e8152. doi: 10.7717/peerj.8152 (PMC6927345; doi:10.7717/peerj.8152)
Supplement: Data S1 [file peerj-07-8152-s001.xlsx]

## Sheet: LBC
seq	sid	LBC	result
1	'362232197201100604	LSIL	NIL
2	'362232197112110827	LSIL	NIL
3	'362232196909010028	LSIL	NIL
4	'362232197911040028	LSIL	NIL
5	'362232196904171420	LSIL	NIL
6	'362232197003050845	LSIL	NIL
7	'36223219661022024X	LSIL	NIL
8	'362232196104210823	LSIL	M
9	'362232196310030022	LSIL	M
10	'362232196702200422	LSIL	M
11	'362232197910020223	LSIL	M
12	'362232196211180025	LSIL	M
13	'362232196608150625	LSIL	M
14	'362232197902180848	LSIL	M
15	'362232197102151820	LSIL	M
16	'362232197001190641	LSIL	LSIL
17	'362232196803220221	LSIL	LSIL
18	'362232197508180223	LSIL	LSIL
19	'362232196902202027	LSIL	LSIL
20	'362232197602111822	LSIL	LSIL
21	'362232197507201627	LSIL	LSIL
22	'362232197005122621	LSIL	LSIL
23	'362232196201050024	LSIL	LSIL
24	'362232196308110627	LSIL	LSIL
25	'362232197209080601	LSIL	LSIL
26	'362232197605230223	LSIL	LSIL
27	'362232197003110027	LSIL	LSIL
28	'362232196712010224	LSIL	LSIL
29	'654123197906226022	LSIL	LSIL
30	'362232196508070046	LSIL	LSIL
31	'362229197302211225	LSIL	LSIL
32	'362232197809170029	LSIL	LSIL
33	'362232196508240025	LSIL	LSIL
34	'362232196912090647	LSIL	LSIL
35	'362232197708040129	LSIL	LSIL
36	'362232197202210020	LSIL	LSIL
37	'362232196609270848	LSIL	LSIL
38	'362232197006120426	LSIL	LSIL
39	'362232197809240846	LSIL	LSIL
40	'362232196911250821	LSIL	LSIL
41	'362232196004170027	LSIL	LSIL
42	'362232197007230026	LSIL	LSIL
43	'362232197608300069	LSIL	LSIL
44	'36223219731012002X	LSIL	LSIL
45	'362232197902090023	LSIL	LSIL
46	'362232197804270421	LSIL	LSIL
47	'36223219780824062X	LSIL	LSIL
48	'362232197910032029	LSIL	LSIL
49	'362232195910190121	LSIL	LSIL
50	'362232197201110028	LSIL	LSIL
51	'362232197905050609	LSIL	LSIL
52	'362232197903028421	LSIL	LSIL
53	'360502196406270924	LSIL	LSIL
54	'362232196808220042	LSIL	LSIL
55	'362232195807070021	LSIL	LSIL
56	'362232196402240043	LSIL	LSIL
57	'362232196807080244	LSIL	LSIL
58	'362232195908250023	LSIL	LSIL
59	'362232196708010048	LSIL	LSIL
60	'362232196308240020	LSIL	LSIL
61	'362232196211181247	LSIL	LSIL
62	'36223219681029012X	LSIL	LSIL
63	'362232197604210824	LSIL	LSIL
64	'362232197911223626	LSIL	LSIL
65	'36223219640121062X	LSIL	LSIL
66	'362232197811090867	LSIL	LSIL
67	'362232196709180049	LSIL	LSIL
68	'362232196608211221	LSIL	LSIL
69	'362232196710270228	LSIL	LSIL
70	'362232197102190026	LSIL	LSIL
71	'362232196303070026	LSIL	LSIL
72	'362232196711180021	LSIL	LSIL
73	'362232197802210024	LSIL	LSIL
74	'362232197005220449	LSIL	LSIL
75	'362232196702280629	LSIL	LSIL
76	'362232195909290045	LSIL	LSIL
77	'362232196302222622	LSIL	LSIL
78	'362232197708041228	LSIL	LSIL
79	'36223219731015082X	LSIL	LSIL
80	'362232196104150023	LSIL	LSIL
81	'362232196608150027	LSIL	LSIL
82	'36223219630731012X	LSIL	LSIL
83	'362232196501291428	LSIL	LSIL
84	'362232196501310027	LSIL	LSIL
85	'362232196809030021	LSIL	LSIL
86	'36223219701124122X	LSIL	LSIL
87	'362232196312070147	LSIL	LSIL
88	'362232196201152047	LSIL	LSIL
89	'362232196511041027	LSIL	LSIL
90	'362232196807130841	LSIL	LSIL
91	'362232196901060020	LSIL	LSIL
92	'360123195702192428	LSIL	LSIL
93	'362232197710030448	LSIL	LSIL
94	'362232197901220228	LSIL	LSIL
95	'36223219721222602X	LSIL	LSIL
96	'36223219601121004X	LSIL	LSIL
97	'362232197005261822	LSIL	LSIL
98	'362232197809080429	LSIL	LSIL
99	'362232197508092426	LSIL	LSIL
100	'362232197505021825	LSIL	LSIL
101	'362232196306070021	LSIL	LSIL
102	'362232197204150447	LSIL	HSIL+
103	'362232197810010444	LSIL	HSIL+
104	'362232197812164523	HSIL+	LSIL
105	'362232197807068005	HSIL+	LSIL
106	'362232197006210422	HSIL+	HSIL+
107	'362232197701301824	HSIL+	HSIL+
108	'36223219760613122X	HSIL+	HSIL+
109	'36223219700329142X	HSIL+	HSIL+
110	'362232196301202427	HSIL+	HSIL+
111	'362232196711291223	HSIL+	HSIL+
112	'362232196208231223	HSIL+	HSIL+
113	'362232197112230645	HSIL+	HSIL+
114	'440923197810200569	HSIL+	HSIL+
115	'362232197110061427	HSIL+	HSIL+
116	'362232196702200628	HSIL+	HSIL+
117	'362232197302050645	HSIL+	HSIL+
118	'362232196504230024	HSIL+	HSIL+
119	'362232197911070020	HSIL+	HSIL+
120	'362232197811070020	HSIL+	HSIL+
121	'362232195810310022	HSIL+	HSIL+
122	'362232196108151226	HSIL+	HSIL+
123	'362232195705230624	HSIL+	HSIL+
124	'362232197906240221	HSIL+	HSIL+
125	'362232197502110224	HSIL+	HSIL+
126	'36223219710509082X	HSIL+	HSIL+
127	'36223219750529062X	HSIL+	HSIL+
128	'362232196804130621	HSIL+	HSIL+
129	'362232197911010042	HSIL+	HSIL+
130	'362232197304210024	HSIL+	HSIL+
131	'362232197607051929	HSIL+	HSIL+
132	'362232197601101227	HSIL+	HSIL+
133	'362232197809240846	HSIL+	HSIL+
134	'320722197710070066	HSIL+	HSIL+
135	'362232196007300026	NIL	NIL
136	'362232196405080225	NIL	NIL
137	'362232196710090045	NIL	NIL
138	'362232196607140222	NIL	NIL
139	'362232197111132426	NIL	NIL
140	'362232196810260625	NIL	NIL
141	'36223219581230202X	NIL	NIL
142	'362232195610251621	NIL	NIL
143	'362232196301081824	NIL	NIL
144	'362232197803098449	NIL	NIL
145	'362232197310150029	NIL	NIL
146	'362232197601280026	NIL	NIL
147	'362232196410210020	NIL	NIL
148	'362232197706290028	NIL	NIL
149	'362232196511100023	NIL	NIL
150	'362232196610200046	NIL	NIL
151	'362232196701090241	NIL	NIL
152	'362232196511040040	NIL	NIL
153	'362232197812258428	NIL	NIL
154	'362232196802240042	NIL	NIL
155	'36223219610725002X	NIL	NIL
156	'362232195809150125	NIL	NIL
157	'362232196804060125	NIL	NIL
158	'362232197009240022	NIL	NIL
159	'362232196607120029	NIL	NIL
160	'362232196305050045	NIL	NIL
161	'362232195910100127	NIL	NIL
162	'362232197511250026	NIL	NIL
163	'362232196410060026	NIL	NIL
164	'362232196506240021	NIL	NIL
165	'362232196104150026	NIL	NIL
166	'360502197907261663	NIL	NIL
167	'36223219740803224x	NIL	NIL
168	'362232197004112243	NIL	NIL
169	'362232197304240028	NIL	NIL
170	'362232196809100648	NIL	NIL
171	'362232195802240025	NIL	NIL
172	'362232195406071828	NIL	NIL
173	'362232197911230447	NIL	NIL
174	'362232195805010627	NIL	NIL
175	'362232196211111820	NIL	NIL
176	'500235197801158027	NIL	NIL
177	'362232197407292023	NIL	NIL
178	'362232197806032027	NIL	NIL
179	'362232197110130023	NIL	NIL
180	'362232197610191826	NIL	NIL
181	'362232196109170023	NIL	NIL
182	'362232197810180121	NIL	NIL
183	'362232197309231921	NIL	NIL
184	'362232196505081225	NIL	NIL
185	'362232196711010022	NIL	NIL
186	'362232197306041228	NIL	NIL
187	'362232197108230041	NIL	NIL
188	'362232197604240425	NIL	NIL
189	'362226197901200641	NIL	NIL
190	'360129197812142225	NIL	NIL
191	'362232197406022021	NIL	NIL
192	'362232196209290145	NIL	NIL
193	'362232197110210621	NIL	NIL
194	'362232197208022426	NIL	NIL
195	'362232196110101228	NIL	NIL
196	'362232196906030824	NIL	NIL
197	'362232197207030026	NIL	NIL
198	'362232197304240028	NIL	NIL
199	'362232195708160463	NIL	NIL
200	'362232197805058440	NIL	NIL
201	'362232196504041221	NIL	NIL
202	'362232196405102420	NIL	NIL
203	'362232197909050847	NIL	NIL
204	'36223219761229022X	NIL	NIL
205	'362232196511210169	NIL	NIL
206	'362232197502280242	NIL	NIL
207	'362232197407090026	NIL	NIL
208	'362232196802170128	NIL	NIL
209	'362232196607050043	NIL	NIL
210	'362232197811290047	NIL	NIL
211	'362232196508070046	NIL	NIL
212	'362232197511250026	NIL	NIL
213	'362232197703298427	NIL	NIL
214	'36223219780510004X	NIL	NIL
215	'362232197601280026	NIL	NIL
216	'362232197909110620	NIL	NIL
217	'362232197506300121	NIL	NIL
218	'362232197106230021	NIL	NIL
219	'362232196712050042	NIL	NIL
220	'362232196310020828	NIL	NIL
221	'362232197601261220	NIL	NIL
222	'362232197105280624	NIL	NIL
223	'362232197703120442	NIL	NIL
224	'362232197103052223	NIL	NIL
225	'362232197801290026	NIL	NIL
226	'362232197902060629	NIL	NIL
227	'362232196905050049	NIL	NIL
228	'362232197907191828	NIL	NIL
229	'362232196012140022	NIL	NIL
230	'362232197912021223	NIL	NIL
231	'36223219790628052X	NIL	NIL
232	'362232197601210041	NIL	NIL
233	'362232196505041629	NIL	NIL
234	'362232197910050028	NIL	NIL
235	'362232196312174622	NIL	NIL
236	'36223219700901022x	NIL	NIL
237	'362232197908050422	NIL	NIL
238	'362232197608251826	NIL	NIL
239	'362232197908180052	NIL	NIL
240	'362232196805102024	NIL	NIL
241	'362232197910231427	NIL	NIL
242	'362232197305030129	NIL	NIL
243	'362232197009260026	NIL	NIL
244	'532627197612180728	NIL	NIL
245	'362232197504250028	NIL	NIL
246	'362232195704120149	NIL	NIL
247	'36223219701014142X	NIL	NIL
248	'362232196612052622	NIL	NIL
249	'362232196208190628	NIL	NIL
250	'362232197301090140	NIL	NIL
251	'362232196712031423	NIL	NIL
252	'362232197912040025	NIL	NIL
253	'362232197801300028	NIL	NIL
254	'362232197910040244	NIL	M
255	'362232197902200624	NIL	M
256	'362232196211080220	NIL	M
257	'362232196009090421	NIL	M
258	'36223219711103042X	NIL	M
259	'362232196612061422	NIL	M
260	'362232197803270029	NIL	M
261	'362232197508260127	NIL	M
262	'362232197810080127	NIL	M
263	'362232196404110023	NIL	M
264	'362232197708181382	NIL	M
265	'362232197006181429	NIL	M
266	'362232197204230024	NIL	LSIL
267	'362232197202192424	NIL	LSIL
268	'362232197811080426	NIL	LSIL
269	'362232197309170161	NIL	LSIL
270	'362232197210100227	NIL	LSIL
271	'362232196604201229	NIL	HSIL+
272	'362232197501100489	NIL	HSIL+
273	'362232197904300426	NIL	HSIL+
274	'362232196308012626	NIL	HSIL+
275	'362232195710300923	NIL	HSIL+
276	'362232197112110026	NIL	HSIL+
277	'362232197709280423	M	NIL
278	'36223219780403002X	M	NIL
279	'362232196901142421	M	NIL
280	'362232197101150049	M	NIL
281	'362232196410150822	M	NIL
282	'362232197807061127	M	NIL
283	'362232197503230629	M	NIL
284	'413027197104247229	M	NIL
285	'36223219790225002X	M	M
286	'362232197711020428	M	M
287	'36223219790429202X	M	M
288	'362232197910240422	M	M
289	'36223219791129084X	M	M
290	'362232195208220124	M	M
291	'36223219750517002X	M	M
292	'362232197811032427	M	M
293	'362232197504121824	M	M
294	'362232197709181425	M	M
295	'362232197207051123	M	M
296	'362232197910171824	M	M
297	'362232196310260821	M	M
298	'362232197306052728	M	M
299	'362232197405230124	M	M
300	'362232197910120227	M	M
301	'362232196902210123	M	M
302	'362232197803241845	M	M
303	'362401197801032883	M	M
304	'362232197007110825	M	M
305	'362232197903241828	M	M
306	'362232197405280424	M	M
307	'362232197907240420	M	M
308	'362232196512061628	M	M
309	'362232197409011849	M	M
310	'362232197006140221	M	M
311	'362232196503160643	M	M
312	'362232197910102123	M	M
313	'362232196712072428	M	M
314	'362232196507130046	M	M
315	'362232197109050026	M	M
316	'362232197707240022	M	M
317	'362232197906043529	M	M
318	'362232197608100024	M	M
319	'362232197005271422	M	M
320	'362232197606101824	M	M
321	'362232196702244947	M	M
322	'362232197507281620	M	M
323	'362232196706200024	M	M
324	'362232196705200022	M	M
325	'362232196810020723	M	M
326	'362232197602072026	M	M
327	'312925197302213088	M	M
328	'362232197809040421	M	M
329	'362232197902230821	M	M
330	'362232196601291628	M	M
331	'362232197203030624	M	M
332	'362232196808040025	M	M
333	'36050219731202504x	M	M
334	'362232197903290322	M	M
335	'362232197205121429	M	M
336	'362232197909012022	M	M
337	'362232195710140429	M	M
338	'362232196601251746	M	M
339	'362232197503110023	M	M
340	'362232196711200424	M	M
341	'362232197905031828	M	M
342	'362232196602071427	M	M
343	'362232196706291229	M	M
344	'362232197703170020	M	M
345	'362232197512240444	M	M
346	'362232197108170421	M	M
347	'362232197101052126	M	M
348	'362226197609140661	M	M
349	'362232195610251621	M	M
350	'362232197812140226	M	M
351	'362232197212280620	M	M
352	'362226197311120641	M	M
353	'362232197801214023	M	M
354	'360123197910171922	M	M
355	'362202197910254085	M	M
356	'362232195810310026	M	M
357	'362232197911180266	M	M
358	'36223219630312002X	M	M
359	'362226197801310624	M	M
360	'362232197909262027	M	M
361	'362232197405010242	M	M
362	'362232197904050224	M	M
363	'36223219790728064x	M	M
364	'362232197805310821	M	M
365	'362232196905062023	M	M
366	'360124197910134240	M	M
367	'362232197104080648	M	M
368	'433122197810044020	M	M
369	'362232197402280045	M	M
370	'362232197511080047	M	M
371	'362232196902152023	M	LSIL
372	'362232197011041228	M	LSIL
373	'362232195602030046	M	LSIL
374	'36223219540824004X	M	LSIL
375	'362232196711231423	M	LSIL
376	'362232195205080023	M	LSIL
377	'362232195101020026	M	LSIL
378	'362232196905190041	M	LSIL
379	'362232197604028421	M	LSIL
380	'362232196702260820	M	LSIL
381	'362232196208150028	M	LSIL
382	'362232196305082049	M	LSIL
383	'362232196506131028	M	LSIL
384	'362232197107031825	M	LSIL
385	'362232197612131026	M	LSIL
386	'36042419790728572x	M	LSIL
387	'362232197309270840	M	LSIL
388	'33010619750302404x	M	HSIL+
389	'36223219620901006x	M	HSIL+
390	'362232196602240021	M	HSIL+
391	'362232196705140023	M	HSIL+
392	'362232196402160027	M	HSIL+
393	'362232196102282022	M	HSIL+
394	'362232196701222021	M	HSIL+
395	'362232195709072021	M	HSIL+

## Sheet: PAP
seq	sid	Pap	result
1	'362232196910272026	LSIL	NIL
2	'362232196501162028	LSIL	NIL
3	'362232195806112027	LSIL	NIL
4	'362232196510112022	LSIL	NIL
5	'362232196403142023	LSIL	NIL
6	'362232195909132020	LSIL	NIL
7	'362232195906252027	LSIL	NIL
8	'362232197312162023	LSIL	NIL
9	'362232197109302027	LSIL	NIL
10	'362232197710202027	LSIL	NIL
11	'362232196102092026	LSIL	M
12	'362232196203102027	LSIL	M
13	'362232196907202026	LSIL	M
14	'362232197510162024	LSIL	M
15	'36223219710215202x	LSIL	M
16	'362232197312152020	LSIL	M
17	'36223219700415024x	LSIL	M
18	'362232197903060028	LSIL	LSIL
19	'362232196602190423	LSIL	LSIL
20	'362232197811132021	LSIL	LSIL
21	'362232196607070025	LSIL	LSIL
22	'362232197004240229	LSIL	LSIL
23	'362232197311160229	LSIL	LSIL
24	'36223219740911022X	LSIL	LSIL
25	'362232197805121828	LSIL	LSIL
26	'362232197907230425	LSIL	LSIL
27	'362232196702091422	LSIL	LSIL
28	'362232197101060625	LSIL	LSIL
29	'362232196609290021	LSIL	LSIL
30	'362232197408121023	LSIL	LSIL
31	'362232197906050027	LSIL	LSIL
32	'362232196405242044	LSIL	LSIL
33	'36223219740514182X	LSIL	LSIL
34	'362232197602131227	LSIL	LSIL
35	'36223219770107182X	LSIL	LSIL
36	'362232195505182048	LSIL	LSIL
37	'362232196607280623	LSIL	LSIL
38	'362232197604280221	LSIL	LSIL
39	'362232196408302028	LSIL	LSIL
40	'362232196909060447	LSIL	LSIL
41	'362232196807250920	LSIL	LSIL
42	'362232196304172040	LSIL	LSIL
43	'362232195301032221	LSIL	LSIL
44	'362232196604280927	LSIL	LSIL
45	'36223219580918202X	LSIL	LSIL
46	'362232197302270746	LSIL	LSIL
47	'362232197102212029	LSIL	LSIL
48	'362232196208012020	LSIL	LSIL
49	'362232196803101867	LSIL	LSIL
50	'362232195808022025	LSIL	LSIL
51	'362232197107311827	LSIL	LSIL
52	'362232197402182028	LSIL	LSIL
53	'362232196002271828	LSIL	LSIL
54	'362232196102172042	LSIL	LSIL
55	'362232196708142024	LSIL	LSIL
56	'362232195502192048	LSIL	LSIL
57	'362232196410182044	LSIL	LSIL
58	'362232195805192029	LSIL	LSIL
59	'362232195211092020	LSIL	LSIL
60	'362232195510082025	LSIL	LSIL
61	'362232197712040420	LSIL	LSIL
62	'362232196901160240	HSIL	LSIL
63	'362232196801181829	HSIL	LSIL
64	'362232197802132021	HSIL	LSIL
65	'36223219570212204X	HSIL	LSIL
66	'362232197608234523	HSIL	LSIL
67	'362232195911212024	HSIL	HSIL+
68	'362232197511151220	HSIL	HSIL+
69	'362232196411200027	HSIL	LSIL
70	'362232195011092020	HSIL	LSIL
71	'362232197002130165	HSIL	HSIL+
72	'362232197210121829	HSIL	HSIL+
73	'362232195503162043	HSIL	HSIL+
74	'362232197010160225	HSIL	HSIL+
75	'362232195807172021	HSIL	HSIL+
76	'36223219790904122X	HSIL	HSIL+
77	'362232196909211022	HSIL	HSIL+
78	'362232195309132026	HSIL	HSIL+
79	'362232196506190829	SCC	HSIL+
80	'362232197502170040	HSIL	HSIL+
81	'362232197601170441	HSIL	HSIL+
82	'36223219661104062X	HSIL	HSIL+
83	'36223219630407102X	NIL	NIL
84	'362232195507230023	NIL	NIL
85	'362232196008112027	NIL	NIL
86	'36223219760812212X	NIL	NIL
87	'362232197508202023	NIL	NIL
88	'362232197702070626	NIL	NIL
89	'36223219750928002X	NIL	NIL
90	'362232197908012825	NIL	NIL
91	'36223219720322044X	NIL	NIL
92	'362232195008122045	NIL	NIL
93	'362232197410050623	NIL	NIL
94	'36223219701109002X	NIL	NIL
95	'362232195411222045	NIL	NIL
96	'362232197308230026	NIL	NIL
97	'362232197012052025	NIL	NIL
98	'362232196802140068	NIL	NIL
99	'36223219761122014X	NIL	NIL
100	'36223219631103202X	NIL	NIL
101	'362232196502020048	NIL	NIL
102	'362232196210210025	NIL	NIL
103	'362232196210172023	NIL	NIL
104	'362232197404060024	NIL	NIL
105	'36223219751211202X	NIL	NIL
106	'362232196105232020	NIL	NIL
107	'362232195206092042	NIL	NIL
108	'362232196212172027	NIL	NIL
109	'362232195602182023	NIL	NIL
110	'362232197002131221	NIL	NIL
111	'362232196310040044	NIL	NIL
112	'362232197108070623	NIL	NIL
113	'362232196511292029	NIL	NIL
114	'362232197902012429	NIL	NIL
115	'362232196506052629	NIL	NIL
116	'362232196811290025	NIL	NIL
117	'362232197112172024	NIL	NIL
118	'362232195409132024	NIL	NIL
119	'362232196610010024	NIL	NIL
120	'362232196701300843	NIL	NIL
121	'362232196909119020	NIL	NIL
122	'362232196501260023	NIL	NIL
123	'362232196811142022	NIL	NIL
124	'362232197304141425	NIL	NIL
125	'362232196611222028	NIL	NIL
126	'362232196708022022	NIL	NIL
127	'362232196806022421	NIL	NIL
128	'362232196311272023	NIL	NIL
129	'362232197801140423	NIL	NIL
130	'362232197312042022	NIL	NIL
131	'362232197403052022	NIL	NIL
132	'362232195912292025	NIL	NIL
133	'362232197412012028	NIL	NIL
134	'362232197612132045	NIL	NIL
135	'362232197905270629	NIL	NIL
136	'362232196309052021	NIL	NIL
137	'362232196303131020	NIL	NIL
138	'362232196310242041	NIL	NIL
139	'362232196508112023	NIL	NIL
140	'362232197502012026	NIL	NIL
141	'362232196707172029	NIL	NIL
142	'362232195001242028	NIL	NIL
143	'362232197611022022	NIL	NIL
144	'362232196011142024	NIL	NIL
145	'362232196708052045	NIL	NIL
146	'362232196205112026	NIL	NIL
147	'362232197608242022	NIL	NIL
148	'362232195408242029	NIL	NIL
149	'362232197010102025	NIL	NIL
150	'362232196202152022	NIL	NIL
151	'362232195610262023	NIL	NIL
152	'362232196105302025	NIL	NIL
153	'362232195402162020	NIL	NIL
154	'362232197307102026	NIL	NIL
155	'362232196602072021	NIL	NIL
156	'362232196112232029	NIL	NIL
157	'362232196612172026	NIL	NIL
158	'362232196706042046	NIL	NIL
159	'362232197508112028	NIL	NIL
160	'362232196009202024	NIL	NIL
161	'362232196808042020	NIL	NIL
162	'362232196608162028	NIL	NIL
163	'362232196308242026	NIL	NIL
164	'362232195510282027	NIL	NIL
165	'362232195007212022	NIL	NIL
166	'362232196608182029	NIL	NIL
167	'362232196003202023	NIL	NIL
168	'362232197404152025	NIL	NIL
169	'362232195703272028	NIL	NIL
170	'362232195310282022	NIL	NIL
171	'362232195802252022	NIL	NIL
172	'362232195905102027	NIL	NIL
173	'362232196401312025	NIL	NIL
174	'362232197510232726	NIL	NIL
175	'362232197510022048	NIL	NIL
176	'362232196310292048	NIL	NIL
177	'36223219760412124X	NIL	NIL
178	'362232196611192025	NIL	NIL
179	'362232195211012027	NIL	NIL
180	'362232197005082023	NIL	NIL
181	'362232196507052022	NIL	NIL
182	'362232196606162024	NIL	M
183	'36223219631107202X	NIL	M
184	'362232195204262028	NIL	M
185	'362232195509272024	NIL	M
186	'362232195409262021	NIL	M
187	'362232196002212027	NIL	M
188	'362232195612212046	NIL	M
189	'362232195912012024	NIL	M
190	'362232196001192020	NIL	M
191	'362232196009022023	NIL	M
192	'362232196907132048	NIL	M
193	'36223219700113202X	NIL	LSIL
194	'362232196212092027	NIL	LSIL
195	'362232195602072027	NIL	LSIL
196	'362232196502192026	NIL	LSIL
197	'36223219550108204X	NIL	LSIL
198	'362232195603112027	NIL	LSIL
199	'36223219760108202X	NIL	LSIL
200	'362232197205072022	NIL	LSIL
201	'362232196504292020	NIL	LSIL
202	'362232196301152028	NIL	LSIL
203	'362232197505132123	NIL	LSIL
204	'362232197010152022	NIL	LSIL
205	'362232196009082022	NIL	LSIL
206	'36223219571112202X	NIL	HSIL+
207	'362232196209152068	NIL	HSIL+
208	'362232197011072021	M	NIL
209	'362232196007092028	M	NIL
210	'362232196206082025	M	NIL
211	'362232195611202022	M	NIL
212	'362232197404162020	M	NIL
213	'36223219690901204X	M	NIL
214	'362232196910112021	M	NIL
215	'362232195402072022	M	NIL
216	'362232196107012021	M	NIL
217	'36223219720907202X	M	NIL
218	'362232196004212020	M	NIL
219	'362232197109192024	M	M
220	'362232196611012020	M	M
221	'362232195108142026	M	M
222	'362232195406192021	M	M
223	'362232195505132024	M	M
224	'362232195501012025	M	M
225	'362232195702252025	M	M
226	'362232196112062023	M	M
227	'362232195303252028	M	M
228	'362232195708012022	M	M
229	'362232196701252028	M	M
230	'36223219741027204X	M	M
231	'362232196301110224	M	M
232	'362232195409122029	M	M
233	'362232196808052026	M	M
234	'362232197307132022	M	M
235	'362232197210042020	M	M
236	'362232195003172026	M	M
237	'362232195004162020	M	M
238	'362232195610132025	M	M
239	'362232197309142128	M	M
240	'362232197002022025	M	M
241	'36223219700129204x	M	M
242	'362232196706232026	M	M
243	'362232195805132026	M	M
244	'362232196409242025	M	M
245	'362232195509172023	M	M
246	'362232197001072020	M	M
247	'362232197907221025	M	M
248	'362232196403090624	M	M
249	'362232195909130121	M	M
250	'36223219770627022x	M	M
251	'362232197605260022	M	M
252	'362232197301140064	M	M
253	'362232196202110025	M	M
254	'362232196811040048	M	M
255	'362232196904120420	M	M
256	'362232197005041624	M	M
257	'362232197811060021	M	M
258	'362232197709288729	M	M
259	'362232197904011225	M	M
260	'362232197407121224	M	M
261	'362232197010251848	M	M
262	'362232197211270228	M	M
263	'362123197007171923	M	M
264	'362232196206012422	M	M
265	'362232195306020024	M	M
266	'362232196908038385	M	M
267	'362232197111070421	M	M
268	'362228196702010069	M	M
269	'362204197101038427	M	M
270	'362201196909150907	M	M
271	'362222197510070060	M	M
272	'362232196208292026	M	M
273	'362232196407092027	M	M
274	'36223219490926204x	M	M
275	'362232197004202043	M	M
276	'362232195412052025	M	M
277	'362232196608112020	M	M
278	'362232195001222024	M	M
279	'362232196110112023	M	M
280	'362232195608062022	M	M
281	'362232196209232025	M	M
282	'362232197011252025	M	M
283	'362232196711292023	M	M
284	'362232196309092023	M	M
285	'362232195211032028	M	M
286	'362232196407062020	M	M
287	'362232197605202025	M	M
288	'362232197010132025	M	M
289	'362232196802192028	M	M
290	'362232195607082024	M	M
291	'362232196609042044	M	LSIL
292	'36223219671029204x	M	LSIL
293	'362232195903012028	M	LSIL
294	'362232197303052025	M	LSIL
295	'362232197306162027	M	LSIL
296	'362232196006082047	M	LSIL
297	'362232196609122028	M	LSIL
298	'362232197408112020	M	LSIL
299	'362232196504272028	M	LSIL
300	'362232195702122028	M	LSIL
301	'362232196904152027	M	LSIL
302	'362232195809062029	M	LSIL
303	'362232195504202027	M	LSIL
304	'36223219580304202x	M	LSIL
305	'362232195011052024	M	LSIL
306	'362232197106252028	M	LSIL
307	'362232196502032022	M	LSIL
308	'362232196410212026	M	LSIL
309	'362232195503262028	M	LSIL
310	'362226196908133029	M	LSIL
311	'362232195405052043	M	LSIL
312	'362232196612312025	M	LSIL
313	'362232197110182026	M	LSIL
314	'362232196603252040	M	LSIL
315	'36223219511224202X	M	LSIL
316	'362232196205122048	M	LSIL
317	'362232195002222029	M	LSIL
318	'362232196008302028	M	LSIL
319	'362232196610190022	M	LSIL
320	'362232195411022023	M	LSIL
321	'362232197505022127	M	LSIL
322	'362232197009082020	M	LSIL
323	'362232197512042126	M	LSIL
324	'362232197707061921	M	LSIL
325	'362232196402092028	M	LSIL
326	'362232196802022025	M	LSIL
327	'362232195310172026	M	LSIL
328	'362232195808162060	M	LSIL
329	'362232196904212026	M	LSIL
330	'36223219690306202X	M	LSIL
331	'362232197502032027	M	LSIL
332	'362232196910081640	M	LSIL
333	'362232197108231829	M	LSIL
334	'362232196504012025	M	LSIL
335	'362232196509122020	M	LSIL
336	'362232196712202026	M	LSIL
337	'36223219740529202X	M	LSIL
338	'362232195612202024	M	LSIL
339	'36223219731124182X	M	LSIL
340	'362232196403082024	M	LSIL
341	'362232195708182064	M	LSIL
342	'362232197209052029	M	LSIL
343	'362232196305092026	M	LSIL
344	'362232196508232025	M	LSIL
345	'362232196212232026	M	LSIL
346	'362232195605292025	M	LSIL
347	'362232197112142028	M	LSIL
348	'362232196303052020	M	LSIL
349	'362232197505241828	M	LSIL
350	'362232196307242024	M	LSIL
351	'362232196812102022	M	LSIL
352	'362232195605082028	M	LSIL
353	'362232195810102024	M	LSIL
354	'362232196906102023	M	LSIL
355	'362232196910252024	M	LSIL
356	'362232196911072025	M	LSIL
357	'362232196710202041	M	LSIL
358	'362232195810092022	M	LSIL
359	'362232196310232046	M	LSIL
360	'362232196908252025	M	LSIL
361	'362232196408312028	M	LSIL
362	'362232197005182024	M	LSIL
363	'362232195905132023	M	LSIL
364	'362232195210062022	M	LSIL
365	'362232196005012047	M	LSIL
366	'362232197010072022	M	LSIL
367	'362232196503062020	M	LSIL
368	'362232196011132029	M	LSIL
369	'362232197710022024	M	LSIL
370	'362232197406222023	M	LSIL
371	'362232195401252021	M	HSIL+
372	'362232196612292028	M	HSIL+
373	'362232197204210124	M	LSIL
374	'362232197011012427	M	LSIL
375	'362232196610070245	M	LSIL
376	'360425197409163722	M	LSIL
377	'362232196601182026	M	HSIL+
378	'362232197106082049	M	HSIL+
379	'362232197806180029	M	HSIL+
380	'362232197208190024	M	HSIL+
381	'362204197906238425	M	HSIL+
382	'36223219740123122X	M	HSIL+
383	'362201197411160846	M	HSIL+
384	'362232196608310043	M	HSIL+
385	'362232197709120020	M	HSIL+

## Sheet: HPV
seq	sid	HPV	result
1	'362232196212152229	≥10.0	NIL
2	'362232196808082225	≥10.0	NIL
3	'362232196708172047	≥10.0	NIL
4	'362232197208190423	≥10.0	NIL
5	'362502198012164020	≥10.0	NIL
6	'362232196503221423	≥10.0	NIL
7	'362232197508150024	≥10.0	NIL
8	'362232197702170424	≥10.0	NIL
9	'362232196906072426	≥10.0	NIL
10	'362232196703200029	≥10.0	NIL
11	'36223219800916202X	≥10.0	NIL
12	'362232195108110828	≥10.0	NIL
13	'362232197504240242	≥10.0	NIL
14	'362232196305040128	≥10.0	NIL
15	'362232197508150023	≥10.0	M
16	'362232196711230024	≥10.0	M
17	'362232197009061125	≥10.0	M
18	'362232196702260126	≥10.0	M
19	'362232197005090023	≥10.0	M
20	'362232196401051224	≥10.0	M
21	'522224198003154221	≥10.0	M
22	'362232198005130428	≥10.0	M
23	'362232197005060020	≥10.0	M
24	'512903197809192281	≥10.0	M
25	'362232196210220427	≥10.0	M
26	'362232195210230420	≥10.0	M
27	'36223219750820044X	≥10.0	M
28	'362204198004098481	≥10.0	M
29	'362232196404092421	≥10.0	M
30	'362232196609180447	≥10.0	M
31	'362232197012060447	≥10.0	M
32	'362232195102270420	≥10.0	M
33	'362232196710050428	≥10.0	LSIL
34	'362232196503120446	≥10.0	LSIL
35	'51222519610315270X	≥10.0	LSIL
36	'362232196001290429	≥10.0	LSIL
37	'362232196609130423	≥10.0	LSIL
38	'362232195702060429	≥10.0	LSIL
39	'362232197910200421	≥10.0	LSIL
40	'51222519630623924X	≥10.0	LSIL
41	'362232197706220425	≥10.0	LSIL
42	'362232195306290425	≥10.0	LSIL
43	'362232195511200441	≥10.0	LSIL
44	'362232196211160436	≥10.0	LSIL
45	'362226196610220621	≥10.0	LSIL
46	'362232195104030449	≥10.0	LSIL
47	'362232195103080428	≥10.0	LSIL
48	'362232196211050423	≥10.0	LSIL
49	'362232196903150468	≥10.0	LSIL
50	'362232196009140425	≥10.0	LSIL
51	'362232196707240423	≥10.0	LSIL
52	'362232196004010429	≥10.0	LSIL
53	'362232197005250445	≥10.0	LSIL
54	'362232196411130428	≥10.0	LSIL
55	'36010419761117198X	≥10.0	LSIL
56	'36223219510712044X	≥10.0	LSIL
57	'362232198010120428	≥10.0	LSIL
58	'362232197306210669	≥10.0	LSIL
59	'362232197210200041	≥10.0	LSIL
60	'36223219650304122X	≥10.0	LSIL
61	'362232196503140025	≥10.0	LSIL
62	'362232197206061624	≥10.0	LSIL
63	'36223219631030082X	≥10.0	LSIL
64	'362232196203150029	≥10.0	LSIL
65	'362232198009061640	≥10.0	LSIL
66	'362232198002091424	≥10.0	LSIL
67	'362232196005080012	≥10.0	LSIL
68	'362232198010240427	≥10.0	LSIL
69	'362232198010051448	≥10.0	LSIL
70	'362232197510220186	≥10.0	LSIL
71	'362232197204091627	≥10.0	LSIL
72	'362232197001041224	≥10.0	LSIL
73	'362232197103151024	≥10.0	LSIL
74	'362232196007212229	≥10.0	HSIL+
75	'362232196703040182	≥10.0	HSIL+
76	'36223219800815024X	≥10.0	HSIL+
77	'362232197311020445	≥10.0	HSIL+
78	'362232196003030428	≥10.0	HSIL+
79	'362232197303182225	≥10.0	HSIL+
80	'36223219721109202X	≥10.0	HSIL+
81	'36223219651010222X	≥10.0	HSIL+
82	'362232196212262225	≥10.0	HSIL+
83	'362232197102042226	≥10.0	HSIL+
84	'362232197501172717	≥10.0	HSIL+
85	'362232196911100223	≥10.0	HSIL+
86	'362232197304272222	≥10.0	HSIL+
87	'362232196502202220	≥10.0	HSIL+
88	'362232196907182221	≥10.0	HSIL+
89	'362232197607182220	≥10.0	HSIL+
90	'362232197703172026	≥10.0	HSIL+
91	'362232195810122228	≥10.0	HSIL+
92	'362232196404272225	≥10.0	HSIL+
93	'362232197202252220	≥10.0	HSIL+
94	'362232195810272226	≥10.0	HSIL+
95	'362232196302123222	≥10.0	HSIL+
96	'362232196207092225	≥10.0	HSIL+
97	'362232196106082028	≥10.0	HSIL+
98	'362232196712032223	≥10.0	HSIL+
99	'362232195711207625	≥10.0	HSIL+
100	'362232196708051827	≥10.0	SCC
101	'362232195401061823	≥10.0	SCC
102	'362232196705251823	≥10.0	SCC
103	'362232197007201823	≥10.0	SCC
104	'362232196710161822	≥10.0	SCC
105	'340122197008136927	1.0-9-9	NIL
106	'362232196607250026	1.0-9-9	NIL
107	'362330198010073820	1.0-9-9	NIL
108	'362232195210232026	1.0-9-9	NIL
109	'362232197506162006	1.0-9-9	NIL
110	'362232196711230228	1.0-9-9	NIL
111	'362232198004302022	1.0-9-9	NIL
112	'362232196102040066	1.0-9-9	NIL
113	'362232196002290204	1.0-9-9	NIL
114	'362232198007280823	1.0-9-9	NIL
115	'362232197011010026	1.0-9-9	NIL
116	'362232196512020423	1.0-9-9	NIL
117	'362232197802100226	1.0-9-9	NIL
118	'362232197109240022	1.0-9-9	NIL
119	'362232197303241221	1.0-9-9	NIL
120	'362232197409161422	1.0-9-9	NIL
121	'362232197203282026	1.0-9-9	NIL
122	'36223219761109004X	1.0-9-9	NIL
123	'362232197303051026	1.0-9-9	NIL
124	'362232196903010027	1.0-9-9	NIL
125	'362232196801280640	1.0-9-9	NIL
126	'362232198004020628	1.0-9-9	NIL
127	'362232197801070066	1.0-9-9	NIL
128	'510311198012164523	1.0-9-9	NIL
129	'362232197501280029	1.0-9-9	NIL
130	'362232197605260022	1.0-9-9	NIL
131	'36223219620704002X	1.0-9-9	NIL
132	'360121196302287526	1.0-9-9	NIL
133	'362232196504020025	1.0-9-9	M
134	'362201197407180828	1.0-9-9	M
135	'362232198011100042	1.0-9-9	M
136	'360122197703050627	1.0-9-9	M
137	'36223219780314062X	1.0-9-9	M
138	'362232197403231426	1.0-9-9	M
139	'362232196906280823	1.0-9-9	M
140	'36223219761101002X	1.0-9-9	M
141	'362232197808180102	1.0-9-9	M
142	'362232196910252024	1.0-9-9	M
143	'362232198012140029	1.0-9-9	M
144	'362226198002010106	1.0-9-9	M
145	'36223219800311142X	1.0-9-9	M
146	'362232196902270046	1.0-9-9	M
147	'362232197009081220	1.0-9-9	M
148	'36223219680627002X	1.0-9-9	M
149	'362201197303280824	1.0-9-9	M
150	'362232197804302022	1.0-9-9	M
151	'362232197608142021	1.0-9-9	M
152	'430626198012150625	1.0-9-9	M
153	'362232196703080223	1.0-9-9	M
154	'362232196902191444	1.0-9-9	M
155	'362232196012240048	1.0-9-9	M
156	'362226198011170624	1.0-9-9	M
157	'362201197711230869	1.0-9-9	M
158	'362232197307160429	1.0-9-9	M
159	'362232196509260028	1.0-9-9	M
160	'362232195707151024	1.0-9-9	M
161	'362232195801211827	1.0-9-9	M
162	'362232196011221224	1.0-9-9	M
163	'362226197512141844	1.0-9-9	LSIL
164	'362232196501220048	1.0-9-9	LSIL
165	'520181198012204827	1.0-9-9	LSIL
166	'362204198008276549	1.0-9-9	LSIL
167	'362232198007150049	1.0-9-9	LSIL
168	'362232197907200041	1.0-9-9	LSIL
169	'362232197010230027	1.0-9-9	LSIL
170	'362232195908302024	1.0-9-9	LSIL
171	'362232195808162024	1.0-9-9	LSIL
172	'360403197807190920	1.0-9-9	LSIL
173	'362232196803210024	1.0-9-9	LSIL
174	'362226197407201227	1.0-9-9	LSIL
175	'362232198010150624	1.0-9-9	LSIL
176	'421127198006210442	1.0-9-9	LSIL
177	'362232196911081626	1.0-9-9	LSIL
178	'362232197411221228	1.0-9-9	LSIL
179	'362232197010080823	1.0-9-9	LSIL
180	'36050219641102092X	1.0-9-9	LSIL
181	'362232196708290027	1.0-9-9	LSIL
182	'362222197502068422	1.0-9-9	LSIL
183	'362232195702150324	1.0-9-9	LSIL
184	'362232198002040125	1.0-9-9	LSIL
185	'362232197505141624	1.0-9-9	LSIL
186	'362232195710080023	1.0-9-9	LSIL
187	'36223219800202122X	1.0-9-9	LSIL
188	'362232198008270047	1.0-9-9	LSIL
189	'362232197902160028	1.0-9-9	LSIL
190	'360123197012090044	1.0-9-9	LSIL
191	'362232196402010424	1.0-9-9	LSIL
192	'362232196904230443	1.0-9-9	LSIL
193	'362232196612300446	1.0-9-9	LSIL
194	'362226197010200701	1.0-9-9	LSIL
195	'362232196802010421	1.0-9-9	LSIL
196	'36223219530425042X	1.0-9-9	LSIL
197	'362232197012270428	1.0-9-9	LSIL
198	'362232197202080424	1.0-9-9	LSIL
199	'362232195904100468	1.0-9-9	LSIL
200	'362232195809120428	1.0-9-9	LSIL
201	'362232196005100426	1.0-9-9	LSIL
202	'362232195808290425	1.0-9-9	LSIL
203	'362232196803040421	1.0-9-9	LSIL
204	'362232197306130420	1.0-9-9	LSIL
205	'362232195711030424	1.0-9-9	LSIL
206	'362232196112270420	1.0-9-9	LSIL
207	'362232196312160429	1.0-9-9	LSIL
208	'362232196801130423	1.0-9-9	LSIL
209	'522323198002131428	1.0-9-9	LSIL
210	'362232196007120420	1.0-9-9	LSIL
211	'362232197607010828	1.0-9-9	LSIL
212	'362232195307190426	1.0-9-9	LSIL
213	'362232197206040444	1.0-9-9	LSIL
214	'362232195609240425	1.0-9-9	LSIL
215	'362232196902240461	1.0-9-9	LSIL
216	'362232195709160422	1.0-9-9	LSIL
217	'362232196302050429	1.0-9-9	LSIL
218	'362232196307050428	1.0-9-9	LSIL
219	'362232195106120421	1.0-9-9	LSIL
220	'362232196707140422	1.0-9-9	LSIL
221	'362232195701170423	1.0-9-9	LSIL
222	'36223219700623042X	1.0-9-9	LSIL
223	'362232197912060426	1.0-9-9	LSIL
224	'362232195806200422	1.0-9-9	LSIL
225	'362232196610020424	1.0-9-9	LSIL
226	'362232196412300425	1.0-9-9	LSIL
227	'362232196803120421	1.0-9-9	LSIL
228	'362232196209100428	1.0-9-9	LSIL
229	'362232195609050429	1.0-9-9	LSIL
230	'362226197307080667	1.0-9-9	LSIL
231	'362232197406130428	1.0-9-9	LSIL
232	'362232196503160421	1.0-9-9	LSIL
233	'362232197303050425	1.0-9-9	LSIL
234	'362232196607270422	1.0-9-9	LSIL
235	'362232197304010441	1.0-9-9	LSIL
236	'362232197209081823	1.0-9-9	LSIL
237	'362232196808240422	1.0-9-9	LSIL
238	'36223219710629042X	1.0-9-9	LSIL
239	'362232196411080424	1.0-9-9	LSIL
240	'522524196703012649	1.0-9-9	LSIL
241	'362232197011290427	1.0-9-9	LSIL
242	'342128198012230424	1.0-9-9	LSIL
243	'360123197709181720	1.0-9-9	LSIL
244	'362232195609300424	1.0-9-9	LSIL
245	'362232196409180426	1.0-9-9	LSIL
246	'362232196604230425	1.0-9-9	LSIL
247	'362232196609260420	1.0-9-9	LSIL
248	'362232197312180440	1.0-9-9	LSIL
249	'362232196501210608	1.0-9-9	LSIL
250	'362232196007220421	1.0-9-9	LSIL
251	'362232196410250428	1.0-9-9	LSIL
252	'362232195201300447	1.0-9-9	LSIL
253	'362425197911104420	1.0-9-9	LSIL
254	'362232195409040461	1.0-9-9	LSIL
255	'362232195708050424	1.0-9-9	LSIL
256	'362232195202240423	1.0-9-9	LSIL
257	'362232196502010421	1.0-9-9	LSIL
258	'362232196805100467	1.0-9-9	LSIL
259	'36223219690701042X	1.0-9-9	LSIL
260	'362232196612230425	1.0-9-9	LSIL
261	'362232197811090466	1.0-9-9	LSIL
262	'362232196805020424	1.0-9-9	LSIL
263	'362232196801170281	1.0-9-9	LSIL
264	'362232195201240421	1.0-9-9	LSIL
265	'362232197106240426	1.0-9-9	LSIL
266	'362232197110020449	1.0-9-9	LSIL
267	'36223219660606044X	1.0-9-9	LSIL
268	'362232196208270425	1.0-9-9	LSIL
269	'360123197712050027	1.0-9-9	LSIL
270	'362232197611270040	1.0-9-9	LSIL
271	'362232197511140426	1.0-9-9	LSIL
272	'362232196201190027	1.0-9-9	LSIL
273	'362232197812240446	1.0-9-9	LSIL
274	'362232195407150421	1.0-9-9	LSIL
275	'362232198010260028	1.0-9-9	LSIL
276	'362221196402191529	1.0-9-9	LSIL
277	'362232197506130126	1.0-9-9	LSIL
278	'362226197206280627	1.0-9-9	LSIL
279	'362232196007180423	1.0-9-9	LSIL
280	'362232196106060427	1.0-9-9	LSIL
281	'362232196011190421	1.0-9-9	LSIL
282	'362232196007100424	1.0-9-9	LSIL
283	'362232195403010448	1.0-9-9	LSIL
284	'362232197007120601	1.0-9-9	LSIL
285	'36220119760322084X	1.0-9-9	LSIL
286	'362232196811060024	1.0-9-9	LSIL
287	'362232195407250449	1.0-9-9	LSIL
288	'362232195202192222	1.0-9-9	LSIL
289	'36223219800604162X	1.0-9-9	LSIL
290	'362232196210221622	1.0-9-9	LSIL
291	'362232197106291625	1.0-9-9	LSIL
292	'362232196408141628	1.0-9-9	LSIL
293	'362232195401151626	1.0-9-9	LSIL
294	'362232196206101628	1.0-9-9	LSIL
295	'362232196310251626	1.0-9-9	LSIL
296	'362232196301111648	1.0-9-9	LSIL
297	'362232195909251628	1.0-9-9	HSIL+
298	'362232197410141461	1.0-9-9	HSIL+
299	'362232196912071622	1.0-9-9	HSIL+
300	'362232195710191621	1.0-9-9	HSIL+
301	'362232195612011623	1.0-9-9	HSIL+
302	'362232196301061628	1.0-9-9	HSIL+
303	'36223219640703162X	1.0-9-9	HSIL+
304	'362232198008141927	1.0-9-9	HSIL+
305	'362232197510151614	1.0-9-9	HSIL+
306	'362232197111141824	1.0-9-9	SCC
307	'362232196603251646	1.0-9-9	SCC
308	'362232195608191625	1.0-9-9	SCC

## Sheet: VIL VILI
seq	sid	VIL/VILI	result
1	'362232196907300128	positive	NIL
2	'362232195612210062	positive	NIL
3	'362232197002252023	positive	NIL
4	'362232196610190044	positive	NIL
5	'362232196212180027	positive	NIL
6	'362232196701090225	positive	NIL
7	'362232195606292422	positive	NIL
8	'362232196512260029	positive	NIL
9	'362232197412240041	positive	NIL
10	'362232197505040022	positive	NIL
11	'362232197711030087	positive	M
12	'362232196902190126	positive	M
13	'362232197509040644	positive	M
14	'362232195609212045	positive	M
15	'362232196411170040	positive	M
16	'362232196409050023	positive	M
17	'362232197310260607	positive	M
18	'362232197102040044	positive	M
19	'362232196603051820	positive	M
20	'362232197606181427	positive	M
21	'362232198007261226	positive	LSIL
22	'362232196311171820	positive	LSIL
23	'362502197201092884	positive	LSIL
24	'421182198008103320	positive	LSIL
25	'362232196805212223	positive	LSIL
26	'362232197609290026	positive	LSIL
27	'362232195210130427	positive	LSIL
28	'362232197206050423	positive	LSIL
29	'362232196905060423	positive	LSIL
30	'362232195303040420	positive	LSIL
31	'362232196109140422	positive	LSIL
32	'362232196309250423	positive	LSIL
33	'362232198012160222	positive	LSIL
34	'362232197601050028	positive	LSIL
35	'360102197906270544	positive	LSIL
36	'36223219760327202X	positive	LSIL
37	'362232196501292220	positive	LSIL
38	'362232197101050524	positive	LSIL
39	'362232195807181028	positive	LSIL
40	'362232197210150048	positive	LSIL
41	'362232196005080212	positive	LSIL
42	'36223219581004002X	positive	LSIL
43	'362232197907170022	positive	LSIL
44	'362232196907200020	positive	LSIL
45	'362232195209230042	positive	LSIL
46	'362232197806270024	positive	LSIL
47	'362232197708201529	positive	LSIL
48	'362232197608261027	positive	LSIL
49	'36223219660318202X	positive	LSIL
50	'362232196202110025	positive	LSIL
51	'362232196803190024	positive	LSIL
52	'362232197506160229	positive	LSIL
53	'362232197006290043	positive	LSIL
54	'362232196405170426	positive	LSIL
55	'362232197212230121	positive	LSIL
56	'362232195504100020	positive	LSIL
57	'362232196807060224	positive	HSIL+
58	'362232196908250425	positive	HSIL+
59	'362232196009120061	positive	HSIL+
60	'362232197904050028	positive	HSIL+
61	'362232197909160421	positive	HSIL+
62	'362232197209270042	positive	HSIL+
63	'362232197505071427	positive	HSIL+
64	'362232197510305927	positive	SCC
65	'362232197012260027	negative	NIL
66	'362232196103270023	negative	NIL
67	'362232196707200026	negative	NIL
68	'362232197904270227	negative	NIL
69	'362232197110220029	negative	NIL
70	'362232197807100027	negative	NIL
71	'362232197605100066	negative	NIL
72	'362232197506300121	negative	NIL
73	'362232197202097862	negative	NIL
74	'362232196409030049	negative	NIL
75	'36223219660415202X	negative	NIL
76	'362232197302160120	negative	NIL
77	'362232196308012626	negative	NIL
78	'211382197806190461	negative	NIL
79	'36223219750825002X	negative	NIL
80	'362232196806240023	negative	NIL
81	'362232196702100026	negative	NIL
82	'36223219770106122X	negative	NIL
83	'362232197911221220	negative	NIL
84	'362232196802170128	negative	NIL
85	'362232197907270129	negative	M
86	'360101197811015064	negative	M
87	'362232196604020129	negative	M
88	'362226197004261823	negative	M
89	'362232196710280022	negative	M
90	'362232196410150021	negative	M
91	'362232196904220026	negative	M
92	'362232196811020068	negative	M
93	'36223219760109002X	negative	M
94	'362232197707072808	negative	M
95	'362232197208150604	negative	M
96	'362232197503192428	negative	M
97	'362232196708182085	negative	M
98	'362232196906130024	negative	M
99	'362232196812230024	negative	M
100	'362232196811262024	negative	M
101	'362232197008020880	negative	M
102	'36223219730310004X	negative	M
103	'362232195701060427	negative	M
104	'362232196701140464	negative	M
105	'330326196904204162	negative	M
106	'362232195303100120	negative	M
107	'362232196407260027	negative	M
108	'362232196906131246	negative	M
109	'362232195408260120	negative	M
110	'360826196905211224	negative	M
111	'362232196012122428	negative	M
112	'362232195903170421	negative	LSIL
113	'362232197801018441	negative	LSIL
114	'362232196301100447	negative	LSIL
115	'362232196101300428	negative	LSIL
116	'36223219581126202X	negative	LSIL
117	'362232196903060227	negative	LSIL
118	'362232197812232422	negative	LSIL
119	'362232197312030442	negative	LSIL
120	'36223219780323002X	negative	LSIL
121	'362232196805100029	negative	LSIL
122	'362232196906290026	negative	LSIL
123	'362232196710270025	negative	LSIL
124	'362232198011300044	negative	LSIL
125	'362232196410021828	negative	LSIL
126	'362232197110091423	negative	LSIL
127	'362232197007261826	negative	LSIL
128	'36223219770913002X	negative	LSIL
129	'362232197212191820	negative	LSIL
130	'362232197404030028	negative	LSIL
131	'362232198006240226	negative	LSIL
132	'362232195701251629	negative	LSIL
133	'362232196010201627	negative	LSIL
134	'362232195807271644	negative	LSIL
135	'36223219650209002X	negative	LSIL
136	'362232198007030025	negative	LSIL
137	'362232195711201844	negative	LSIL
138	'36223219770630002X	negative	LSIL
139	'362232196703211625	negative	LSIL
140	'362232196802080026	negative	LSIL
141	'362232196102121827	negative	LSIL
142	'36223219701011144X	negative	LSIL
143	'362232195606191621	negative	LSIL
144	'362232195507061864	negative	LSIL
145	'362232197703112023	negative	LSIL
146	'362232196402251623	negative	LSIL
147	'362232195810201620	negative	LSIL
148	'362232195905010026	negative	LSIL
149	'362232196503092828	negative	LSIL
150	'362232196110231620	negative	LSIL
151	'362232197606181625	negative	LSIL
152	'362232196107250046	negative	LSIL
153	'362232196106240216	negative	LSIL
154	'362232197508300627	negative	LSIL
155	'362232197310231849	negative	LSIL
156	'360925197307172027	negative	LSIL
157	'362232195806031622	negative	LSIL
158	'513022197304240509	negative	LSIL
159	'362232195306161826	negative	LSIL
160	'362232196610272023	negative	LSIL
161	'362232196804161022	negative	LSIL
162	'362232196907021620	negative	LSIL
163	'362232197510301426	negative	LSIL
164	'362232196207310026	negative	LSIL
165	'362232196804031826	negative	LSIL
166	'362232196310131624	negative	LSIL
167	'362232196611221623	negative	LSIL
168	'362232196303211626	negative	LSIL
169	'362232195708051822	negative	LSIL
170	'362232197401151668	negative	LSIL
171	'362232197012271221	negative	LSIL
172	'362232197901242047	negative	LSIL
173	'362232197409295721	negative	LSIL
174	'362232196611013741	negative	LSIL
175	'362232196510120129	negative	LSIL
176	'362232196001070629	negative	HSIL+
177	'362232197608261020	negative	HSIL+
178	'362232197307060049	negative	HSIL+
179	'36223219791118024X	negative	HSIL+
180	'362232196007300026	negative	HSIL+
181	'362232196310020043	negative	SCC
182	'362232197109050026	negative	SCC

## Sheet: HPV Type
seq	sid	HPV type	result
1	'362232196805261826	HPV16，18+	NIL
2	'36222219701120440X	HPV16，18+	NIL
3	'362232196310151828	HPV16，18+	NIL
4	'362232196504021626	HPV16，18+	NIL
5	'362232196510110123	HPV16，18+	NIL
6	'362232196007171623	HPV16，18+	NIL
7	'362232196701052229	HPV16，18+	NIL
8	'362232195607100429	HPV16，18+	NIL
9	'362232195303210042	HPV16，18+	NIL
10	'512226197112124066	HPV16，18+	NIL
11	'36223219561026044X	HPV16，18+	NIL
12	'362232196205190446	HPV16，18+	NIL
13	'362232195110290423	HPV16，18+	NIL
14	'362232197303230426	HPV16，18+	NIL
15	'362232196901200425	HPV16，18+	NIL
16	'362232198003060044	HPV16，18+	NIL
17	'362232197008140049	HPV16，18+	NIL
18	'510922197904020682	HPV16，18+	NIL
19	'362232195802250027	HPV16，18+	NIL
20	'362232196805150042	HPV16，18+	NIL
21	'362232198009112225	HPV16，18+	NIL
22	'360423197411054020	HPV16，18+	NIL
23	'362232197012221626	HPV16，18+	NIL
24	'36223219520124162X	HPV16，18+	NIL
25	'362232196812051624	HPV16，18+	NIL
26	'362232196010161629	HPV16，18+	NIL
27	'36223219730127162X	HPV16，18+	NIL
28	'362232196104156124	HPV16，18+	NIL
29	'362232196510061624	HPV16，18+	M
30	'362232197408151628	HPV16，18+	M
31	'362232195604051625	HPV16，18+	M
32	'362232197603261822	HPV16，18+	M
33	'362232196101181625	HPV16，18+	M
34	'362232196005051628	HPV16，18+	M
35	'362232197503241621	HPV16，18+	M
36	'36223219780716192X	HPV16，18+	M
37	'362232197407172822	HPV16，18+	M
38	'362232195202141628	HPV16，18+	M
39	'362232196907281625	HPV16，18+	M
40	'362232198002042821	HPV16，18+	M
41	'36223219680807222X	HPV16，18+	M
42	'362232197710101621	HPV16，18+	M
43	'362232197511011842	HPV16，18+	M
44	'362232195610051648	HPV16，18+	M
45	'36223219551209162X	HPV16，18+	M
46	'362232196501121824	HPV16，18+	M
47	'362232196502241828	HPV16，18+	M
48	'362232197704030222	HPV16，18+	M
49	'36223219580515142X	HPV16，18+	M
50	'362232195208021627	HPV16，18+	LSIL
51	'362232197003281627	HPV16，18+	LSIL
52	'362232197911051245	HPV16，18+	LSIL
53	'362232197707061948	HPV16，18+	LSIL
54	'362232196511011629	HPV16，18+	LSIL
55	'362232197102061646	HPV16，18+	LSIL
56	'362232196710101627	HPV16，18+	LSIL
57	'362232195704291626	HPV16，18+	LSIL
58	'362232196505120028	HPV16，18+	LSIL
59	'362232197812260421	HPV16，18+	LSIL
60	'362232195003010621	HPV16，18+	LSIL
61	'362232196411180628	HPV16，18+	LSIL
62	'36223219620118062X	HPV16，18+	LSIL
63	'362232196506170625	HPV16，18+	LSIL
64	'362232197903230623	HPV16，18+	LSIL
65	'362232195911150826	HPV16，18+	LSIL
66	'362232195911050227	HPV16，18+	LSIL
67	'362232195905090021	HPV16，18+	LSIL
68	'362232197011130124	HPV16，18+	LSIL
69	'362232197503301022	HPV16，18+	LSIL
70	'362232197611132027	HPV16，18+	LSIL
71	'362232196001111822	HPV16，18+	LSIL
72	'362232197112161421	HPV16，18+	LSIL
73	'362232197110201223	HPV16，18+	LSIL
74	'362232195512291824	HPV16，18+	LSIL
75	'362232195102111624	HPV16，18+	LSIL
76	'362232195708251621	HPV16，18+	LSIL
77	'362232196307231827	HPV16，18+	LSIL
78	'362232195712211622	HPV16，18+	LSIL
79	'362232196707071826	HPV16，18+	LSIL
80	'362232196904231825	HPV16，18+	LSIL
81	'362232196903010026	HPV16，18+	LSIL
82	'362226196112210623	HPV16，18+	LSIL
83	'362232197711131822	HPV16，18+	LSIL
84	'362232196807251824	HPV16，18+	LSIL
85	'362232196307042027	HPV16，18+	LSIL
86	'36223219570130142X	HPV16，18+	LSIL
87	'362232196612280449	HPV16，18+	LSIL
88	'362232197402021646	HPV16，18+	LSIL
89	'362232195806041628	HPV16，18+	LSIL
90	'362232196609221827	HPV16，18+	LSIL
91	'36223219610505122X	HPV16，18+	LSIL
92	'362232197410070261	HPV16，18+	LSIL
93	'362232195810241622	HPV16，18+	LSIL
94	'362232197603171923	HPV16，18+	LSIL
95	'362232195208131826	HPV16，18+	LSIL
96	'36223219640916002X	HPV16，18+	LSIL
97	'362232195603151827	HPV16，18+	LSIL
98	'362232195908190042	HPV16，18+	LSIL
99	'362232195610131824	HPV16，18+	LSIL
100	'362232195506130822	HPV16，18+	LSIL
101	'362232197503110023	HPV16，18+	LSIL
102	'362232197510021248	HPV16，18+	LSIL
103	'362232196912261824	HPV16，18+	LSIL
104	'362232196301011647	HPV16，18+	LSIL
105	'362232197202171826	HPV16，18+	LSIL
106	'362232196812021820	HPV16，18+	LSIL
107	'36223219661114164X	HPV16，18+	LSIL
108	'362232196405201621	HPV16，18+	LSIL
109	'362232195711081627	HPV16，18+	LSIL
110	'362232197007261623	HPV16，18+	LSIL
111	'362232196808021625	HPV16，18+	LSIL
112	'362232196411111622	HPV16，18+	LSIL
113	'362232196305181649	HPV16，18+	LSIL
114	'362232196409261621	HPV16，18+	LSIL
115	'362232197610041828	HPV16，18+	LSIL
116	'362232197909120643	HPV16，18+	LSIL
117	'362232195307121623	HPV16，18+	LSIL
118	'362232195612221620	HPV16，18+	LSIL
119	'36223219680822182X	HPV16，18+	LSIL
120	'362201197503060842	HPV16，18+	LSIL
121	'360123196406060943	HPV16，18+	LSIL
122	'362226196005030029	HPV16，18+	LSIL
123	'362232195703161627	HPV16，18+	LSIL
124	'362226197909260040	HPV16，18+	LSIL
125	'362232196711071626	HPV16，18+	LSIL
126	'362232197508181621	HPV16，18+	LSIL
127	'362232197903231828	HPV16，18+	LSIL
128	'362232196208161624	HPV16，18+	LSIL
129	'36223219620905162X	HPV16，18+	LSIL
130	'362232197412301625	HPV16，18+	LSIL
131	'362232195202231623	HPV16，18+	LSIL
132	'362232195805201626	HPV16，18+	LSIL
133	'362232196212211620	HPV16，18+	LSIL
134	'362232196612091621	HPV16，18+	LSIL
135	'362232195809021622	HPV16，18+	LSIL
136	'362232196002021626	HPV16，18+	LSIL
137	'36223219631022162X	HPV16，18+	LSIL
138	'362232196702121628	HPV16，18+	LSIL
139	'362232196501061649	HPV16，18+	LSIL
140	'36223219730514162X	HPV16，18+	LSIL
141	'362232195607091622	HPV16，18+	LSIL
142	'362232196212011629	HPV16，18+	LSIL
143	'36223219670609142X	HPV16，18+	LSIL
144	'362232196409131624	HPV16，18+	LSIL
145	'362226197510230640	HPV16，18+	LSIL
146	'362232197605140020	HPV16，18+	LSIL
147	'362232196209241626	HPV16，18+	LSIL
148	'36223219671016162X	HPV16，18+	LSIL
149	'362232197308031629	HPV16，18+	LSIL
150	'362232195810261623	HPV16，18+	LSIL
151	'362232197105211822	HPV16，18+	LSIL
152	'36223219640826162X	HPV16，18+	LSIL
153	'362232196605131621	HPV16，18+	LSIL
1	'36223219660624162X	HPV16，18+	HSIL+
2	'362232196605291625	HPV16，18+	HSIL+
3	'362232195807271628	HPV16，18+	HSIL+
4	'362232197005131243	HPV16，18+	HSIL+
5	'362232196012141621	HPV16，18+	HSIL+
6	'362232197601251647	HPV16，18+	HSIL+
7	'362232197609251625	HPV16，18+	HSIL+
8	'362232197305151828	HPV16，18+	HSIL+
9	'36223219720612164X	HPV16，18+	HSIL+
10	'362501196708070624	HPV16，18+	HSIL+
11	'362232197505290024	HPV16，18+	HSIL+
12	'362232196507271620	HPV16，18+	HSIL+
13	'362226196412280105	HPV16，18+	HSIL+
14	'362232197207021624	HPV16，18+	HSIL+
15	'362226198011141826	HPV16，18+	HSIL+
16	'362232196111201626	HPV16，18+	HSIL+
17	'362232196512221628	HPV16，18+	HSIL+
18	'362232196907301921	HPV16，18+	HSIL+
19	'362232197012200024	HPV16，18+	HSIL+
20	'362232195811291621	HPV16，18+	HSIL+
21	'362232196512100226	HPV16，18+	HSIL+
22	362232196710141426	HPV16，18+	HSIL+
23	'362232195708281628	HPV16，18+	HSIL+
24	'362232197304081629	HPV16，18+	HSIL+
25	'362232197110041020	HPV16，18+	HSIL+
26	'362232196207141621	HPV16，18+	HSIL+
27	'362232196602211626	HPV16，18+	HSIL+
28	'362232197307091822	HPV16，18+	HSIL+
29	'362232196711241621	HPV16，18+	HSIL+
30	'362232196911041625	HPV16，18+	HSIL+
31	'362232197007130228	HPV16，18+	HSIL+
32	'362232196606171828	HPV16，18+	HSIL+
33	'362232195706020029	HPV16，18+	HSIL+
34	'362232198007141826	HPV16，18+	HSIL+
35	'36223219590202182X	HPV16，18+	HSIL+
36	'362232196910141623	HPV16，18+	HSIL+
37	'362232197505212429	HPV16，18+	HSIL+
38	'362232196004150122	HPV16，18+	HSIL+
39	'362232195201191623	HPV16，18+	HSIL+
40	'362232197012201625	HPV16，18+	HSIL+
41	'362232197810091627	HPV16，18+	HSIL+
42	'362232197612291847	HPV16，18+	HSIL+
43	'36223219761229184X	HPV16，18+	HSIL+
44	'362232196902191428	HPV16，18+	HSIL+
45	'36223219730506162X	HPV16，18+	HSIL+
46	'362232196605130821	HPV16，18+	HSIL+
47	'362232196305210045	HPV16，18+	HSIL+
48	'360925197803151428	HPV16，18+	HSIL+
49	'362232195512240023	HPV16，18+	HSIL+
50	'362232196310110022	HPV16，18+	HSIL+
51	'362232196706112024	HPV16，18+	HSIL+
52	'36223219670720182X	HPV16，18+	HSIL+
53	'362228198003050028	HPV16，18+	HSIL+
54	'362232197911090826	HPV16，18+	HSIL+
55	'362232197901080122	HPV16，18+	HSIL+
56	'362232197710220022	HPV16，18+	HSIL+
57	'362232196907311820	HPV16，18+	SCC
58	'362232197807212045	HPV16，18+	SCC
59	'362232197604210824	HPV16，18+	SCC
60	'362232197709280642	HPV16，18+	SCC
61	'362232197610170021	HPV16，18+	SCC
62	'362232196402240043	HPV16，18+	SCC
63	'362232196512290025	HPV16，18+	SCC
64	'362232197003241625	HPV16，18+	SCC
65	'362232195911280022	HPV16，18+	SCC
66	'362232196808171623	HPV16，18+	AGC
1	'362232197012241045	others	NIL
2	'36223219691104004X	others	NIL
3	'362232196008020026	others	NIL
4	'36223219710521182X	others	NIL
5	'362232196807180827	others	NIL
6	'362232197508180020	others	NIL
7	'362232197906210045	others	NIL
8	'362232198002030822	others	NIL
9	'362232195610170049	others	NIL
10	'362232197107102427	others	NIL
11	'362232196007100024	others	NIL
12	'362232196907240022	others	NIL
13	'362204198006238425	others	NIL
14	'362232196612240227	others	NIL
15	'362232197009061828	others	NIL
16	'362232198010082027	others	NIL
17	'362232197611051227	others	NIL
18	'362204198009038445	others	NIL
19	'362232197609141928	others	NIL
20	'362232197101030848	others	NIL
21	'362232197104061826	others	NIL
22	'362232196610280226	others	NIL
23	'36223219750210262X	others	NIL
24	'362232197808142624	others	NIL
25	'362232196910080023	others	NIL
26	'362232196611041622	others	NIL
27	'362232196205230022	others	NIL
28	'362232195901142021	others	NIL
29	'36223219780219022X	others	NIL
30	'362232197002041023	others	NIL
31	'362232196006061027	others	NIL
32	'362226197102151820	others	NIL
33	'362232197301110025	others	NIL
34	'362232196501180824	others	NIL
35	'362201197610200863	others	NIL
36	'362232195711070020	others	NIL
37	'362232195610051621	others	NIL
38	'362232197802182027	others	NIL
39	'362232197506010423	others	NIL
40	'362201197709190888	others	NIL
41	'362232197108131625	others	NIL
42	'362232196911271622	others	NIL
43	'362232196505224164	others	NIL
44	'362232197710151629	others	NIL
45	'362232196702100026	others	NIL
46	'362232197908141848	others	NIL
47	'362232198001181827	others	NIL
48	'362232196601171829	others	NIL
49	'362232197307141824	others	NIL
50	'362232196908270020	others	NIL
51	'36223219620112082X	others	NIL
52	'362232197202180028	others	NIL
53	'362232196709180049	others	NIL
54	'362232196112220044	others	NIL
55	'36223219650327002X	others	NIL
56	'362232197002091645	others	NIL
57	'362232198002040020	others	NIL
58	'362232196302220061	others	NIL
59	'362232196001120024	others	NIL
60	'362232197707271822	others	NIL
61	'362232195211030022	others	NIL
62	'362232196408150823	others	NIL
63	'362232196808210020	others	NIL
64	'362232197502230824	others	NIL
65	'362232196704170028	others	NIL
66	'362232197507222620	others	NIL
67	'362232198012220220	others	NIL
68	'362232196212081627	others	NIL
69	'362232198007121641	others	NIL
70	'362232195910181620	others	NIL
71	'362232196610091626	others	NIL
72	'362232196311111625	others	NIL
73	'36223219660712162X	others	NIL
74	'362232195510161620	others	NIL
75	'362232197606151629	others	NIL
76	'362232196708071625	others	NIL
77	'362232197001141620	others	NIL
78	'362232197002021620	others	NIL
79	'362232197001101629	others	NIL
80	'362232197010261827	others	NIL
81	'362232195906061626	others	NIL
82	'362232197610221626	others	NIL
83	'362232195505231620	others	NIL
84	'362232195609051624	others	NIL
85	'362232196510111628	others	NIL
86	'362232196302141646	others	NIL
87	'362232195212061621	others	NIL
88	'362232196511201625	others	NIL
89	'362232197110101628	others	NIL
90	'362232196006031629	others	NIL
91	'362232197004051620	others	NIL
92	'362232196301011620	others	NIL
93	'362232197512121621	others	NIL
94	'362232195511081622	others	NIL
95	'362232197501151681	others	NIL
96	'362232196809091641	others	NIL
97	'362232197006121426	others	NIL
98	'362232195708241626	others	NIL
99	'36223219520613162X	others	NIL
100	'362204198006288428	others	NIL
101	'362232195807241621	others	NIL
102	'362232195112101625	others	NIL
103	'362232196910151629	others	NIL
104	'362232197708191619	others	NIL
105	'362232196602151627	others	NIL
106	'362232197302241625	others	NIL
107	'362232196512061628	others	NIL
108	'362232196405101620	others	NIL
109	'36223219670726162X	others	NIL
110	'362232197612211448	others	NIL
111	'362232196810061626	others	NIL
112	'362232196708211624	others	NIL
113	'362232196712311628	others	M
114	'362232196601241620	others	M
115	'362232195503151627	others	M
116	'362232196803101626	others	M
117	'362232196605191624	others	M
118	'362232195703201625	others	M
119	'36223219620526162X	others	M
120	'362232195408161624	others	M
121	'362232196910081624	others	M
122	'362232196702091625	others	M
123	'362232196906191644	others	M
124	'362232197608041680	others	M
125	'36223219720105162X	others	M
126	'36223219800611282X	others	M
127	'362232197309074041	others	M
128	'362232197603241821	others	M
129	'362232195507051623	others	M
130	'362232196411281621	others	M
131	'362232195208281621	others	M
132	'362232196702191626	others	M
133	'362232197403021621	others	M
134	'362232197310081422	others	M
135	'362232196801041623	others	M
136	'362232196401201624	others	M
137	'362232196203061627	others	M
138	'362232196301241629	others	M
139	'362232196808111620	others	M
140	'362232197810231925	others	M
141	'362232196804291820	others	M
142	'362232195711201625	others	M
143	'362232195807132249	others	M
144	'362232196005232242	others	M
145	'362232196606142226	others	M
146	'362232197710012223	others	M
147	'362232195708082223	others	M
148	'362232195804112242	others	M
149	'362232195801122226	others	M
150	'362232195602242225	others	M
151	'362232196607052243	others	M
152	'362232197009012022	others	M
153	'362232195607232229	others	M
154	'362232196504162226	others	M
155	'362232195210012228	others	M
156	'362232196204082224	others	M
157	'362232196607142260	others	M
158	'36223219530527222X	others	M
159	'362232197106242049	others	M
160	'362232196411252222	others	M
161	'362232196509132245	others	M
162	'36223219521109224X	others	M
163	'362232195409132024	others	M
164	'362232196902082221	others	M
165	'413029196711223825	others	M
166	'362232196606192223	others	M
167	'362232196210182248	others	M
168	'362232195703112227	others	M
169	'36223219560602222X	others	M
170	'362232197109102228	others	M
171	'362232195607012226	others	M
172	'362232195310262267	others	M
173	'362232195808072222	others	M
174	'36223219530905222X	others	M
175	'362232195811132225	others	M
176	'36223219651029222X	others	M
177	'362232197009072244	others	M
178	'362232195211122226	others	M
179	'362232195411262223	others	M
180	'362232196207072224	others	M
181	'362232196604182224	others	M
182	'362232197110302227	others	M
183	'362232197005092221	others	M
184	'362232196906022226	others	M
185	'362232196608172226	others	M
186	'362232196711242229	others	M
187	'362232196812232222	others	M
188	'362232196305182224	others	M
189	'362232197711260069	others	M
190	'362232197410042244	others	M
191	'362232195503232222	others	M
192	'362232197706222208	others	M
193	'362232196801202220	others	M
194	'362232195601142222	others	M
195	'362232195611162227	others	M
196	'362232196106162247	others	M
197	'362232196701192221	others	M
198	'362232195811192228	others	M
199	'362232196206132221	others	M
200	'362232196307052220	others	M
201	'36223219570309224X	others	M
202	'362232196204022221	others	M
203	'362232195502142227	others	M
204	'362232196310182229	others	M
205	'362232195306242220	others	M
206	'362232197101042240	others	M
207	'362232195309062227	others	M
208	'362232195309032222	others	M
209	'362232197508212221	others	M
210	'362232196107072227	others	M
211	'362232195910202225	others	M
212	'362232195210182227	others	M
213	'362232195301012222	others	M
214	'362232195307072227	others	M
215	'362232195701042229	others	M
216	'362232195206162245	others	M
217	'362232197510262025	others	M
218	'362232197305142024	others	M
219	'362232197208202267	others	M
220	'36223219680502226X	others	M
221	'362232197411212284	others	M
222	'362226197609022729	others	M
223	'36223219610601202X	others	M
224	'362232197007201825	others	M
225	'36223219640215222X	others	M
226	'362232196410302224	others	M
227	'36223219680423202X	others	M
228	'362232196310012246	others	M
229	'362232196406212242	others	M
230	'36223219570314162X	others	M
231	'362232196302272021	others	M
232	'362232196211202220	others	M
233	'362232195402132240	others	M
234	'362232196509152027	others	M
235	'362232197412262240	others	M
236	'362232195702042220	others	M
237	'36223219660504224X	others	M
238	'362232195304232221	others	M
239	'362232196403142226	others	M
240	'362232196608232225	others	M
241	'362232197409082222	others	M
242	'362232196603132225	others	M
243	'362232196502282224	others	M
244	'362232196507172227	others	M
245	'362232195111162220	others	M
246	'362232195701012222	others	M
247	'362232195301012223	others	M
248	'36223219600715222X	others	M
249	'362232196310062227	others	M
250	'362232197008082221	others	M
251	'362232195205132225	others	M
252	'362232197709232026	others	M
253	'362232195311202223	others	M
254	'362232197004082224	others	M
255	'362232196608022228	others	M
256	'362232195308152229	others	M
257	'36223219750828222X	others	M
258	'36223219650815222X	others	M
259	'362232195506192221	others	M
260	'362232196407262228	others	M
261	'362232195405222225	others	M
262	'362232197003272229	others	LSIL
263	'362232195910072221	others	LSIL
264	'362232197608172220	others	LSIL
265	'362232195608262227	others	LSIL
266	'362232195106121227	others	LSIL
267	'362232196711022226	others	LSIL
268	'362232197609222226	others	LSIL
269	'36223219700425222X	others	LSIL
270	'362232195208292224	others	LSIL
271	'362232196009232223	others	LSIL
272	'362232196312182222	others	LSIL
273	'36223219520918222X	others	LSIL
274	'362232195210202223	others	LSIL
275	'362232195211080320	others	LSIL
276	'362232196207192220	others	LSIL
277	'362232196609042220	others	LSIL
278	'362232196112012229	others	LSIL
279	'362232196403212220	others	LSIL
280	'36223219571124182X	others	LSIL
281	'362232196106022228	others	LSIL
282	'362232196409182224	others	LSIL
283	'362232196803051825	others	LSIL
284	'362232197212242229	others	LSIL
285	'36223219660101222X	others	LSIL
286	'362232196606292224	others	LSIL
287	'362232196410282024	others	LSIL
288	'362232195509252023	others	LSIL
289	'362232196410142021	others	LSIL
290	'360424197204085701	others	LSIL
291	'362232196708182069	others	LSIL
292	'362232197701203020	others	LSIL
293	'362232197209212029	others	LSIL
294	'36223219600618202X	others	LSIL
295	'362226195201101024	others	LSIL
296	'362232196711010022	others	LSIL
297	'362232196604300024	others	LSIL
298	'360123196308150929	others	LSIL
299	'362232197804031927	others	LSIL
300	'362232197809191823	others	LSIL
301	'362232197610261644	others	LSIL
302	'362226197212100629	others	LSIL
303	'36222619550216332X	others	LSIL
304	'362232196002290025	others	LSIL
305	'362232196310090025	others	LSIL
306	'362232197208070620	others	LSIL
307	'36223219631231044X	others	LSIL
308	'362232196603030069	others	LSIL
309	'362232197707180624	others	LSIL
310	'362232196407011821	others	LSIL
311	'362232197203112106	others	LSIL
312	'362226198012060028	others	LSIL
313	'362232196803231026	others	LSIL
314	'36223219631014162X	others	LSIL
315	'362232197503271628	others	LSIL
316	'362232197701251628	others	LSIL
317	'362232196608051627	others	LSIL
318	'36223219661125162X	others	LSIL
319	'362232197803241228	others	LSIL
320	'362232195111151628	others	LSIL
321	'362232195410071628	others	LSIL
322	'362232197107271626	others	LSIL
323	'362232197201191622	others	LSIL
324	'362232196304021621	others	LSIL
325	'362429197910191927	others	LSIL
326	'362232196508071620	others	LSIL
327	'362232195610091623	others	LSIL
328	'362232196301091624	others	LSIL
329	'362232196311161622	others	LSIL
330	'362232195402201621	others	LSIL
331	'362232196307011621	others	LSIL
332	'362232197009071620	others	LSIL
333	'362232195103251629	others	LSIL
334	'362232196506151627	others	LSIL
335	'362232196208111627	others	LSIL
336	'362232196502211629	others	LSIL
337	'362232196311061621	others	LSIL
338	'362232196604161642	others	LSIL
339	'360423196804274046	others	LSIL
340	'362232196712241623	others	LSIL
341	'362232197010061622	others	LSIL
342	'362232195202041627	others	LSIL
343	'362232196501151628	others	LSIL
344	'362232197206181626	others	LSIL
345	'362232197306211626	others	LSIL
346	'362232196410161628	others	LSIL
347	'362232196808181629	others	LSIL
348	'362232196810101624	others	LSIL
349	'362232196004081622	others	LSIL
350	'362232196811081629	others	LSIL
351	'362232196505041629	others	LSIL
352	'362232196704181624	others	LSIL
353	'362232195108151627	others	LSIL
354	'36223219791210162X	others	LSIL
355	'362232197502141629	others	LSIL
356	'362232195904231628	others	LSIL
357	'362232196507301623	others	LSIL
358	'362232197207071621	others	LSIL
359	'362232195808081623	others	LSIL
360	'362232197004221626	others	LSIL
361	'362232197804121623	others	LSIL
362	'362232196712171629	others	LSIL
363	'362232196809181620	others	LSIL
364	'36223219720818162X	others	LSIL
365	'362232196402041626	others	LSIL
366	'362232195912031626	others	LSIL
367	'362232196312211628	others	LSIL
368	'362232197409121022	others	LSIL
369	'362232197909201423	others	LSIL
370	'362232197105272422	others	LSIL
371	'362232197003130426	others	LSIL
372	'362232197907011423	others	LSIL
373	'362232196007270224	others	LSIL
374	'362232197909020060	others	LSIL
375	'362232197502280629	others	LSIL
376	'362232197101030020	others	LSIL
377	'362232198003280428	others	LSIL
378	'362232197112030242	others	LSIL
379	'36223219800708182X	others	LSIL
380	'362232196605072422	others	LSIL
381	'36223219691107002X	others	LSIL
382	'362232198005280424	others	LSIL
383	'362232198008271242	others	LSIL
384	'36223219701212232X	others	LSIL
385	'362232195102210324	others	LSIL
386	'362232197312170248	others	LSIL
387	'362232196402131223	others	LSIL
388	'362232198011082004	others	LSIL
389	'362232195508032022	others	LSIL
390	'362232197102270026	others	LSIL
391	'362232198003180628	others	LSIL
392	'362232195701231022	others	LSIL
393	'362232197203270025	others	LSIL
394	'350624198001211045	others	LSIL
395	'360103198003105426	others	LSIL
396	'532524198011120922	others	LSIL
397	'362232198010070441	others	LSIL
398	'362232197110180821	others	LSIL
399	'362232196901090828	others	LSIL
400	'362232197002232022	others	LSIL
401	'362232195811052026	others	LSIL
402	'362232198007161026	others	LSIL
403	'362232197304080220	others	LSIL
404	'362232197703080826	others	LSIL
405	'362232198007050024	others	LSIL
406	'362232197004231429	others	LSIL
407	'362232197112231022	others	LSIL
408	'362232197611240220	others	LSIL
409	'362232196603310024	others	LSIL
410	'362232197504300021	others	LSIL
411	'362232196909280047	others	LSIL
412	'362232196508130022	others	LSIL
413	'362232198004160227	others	LSIL
414	'362232197301231425	others	LSIL
415	'362232196811201221	others	LSIL
416	'362232198011220425	others	LSIL
417	'362232197507020121	others	LSIL
418	'362232196812110129	others	LSIL
419	'362232196105040224	others	LSIL
420	'362232196601262201	others	LSIL
421	'362232197012162026	others	LSIL
422	'362232196512292020	others	LSIL
423	'452702197612244769	others	LSIL
424	'362232197302231425	others	LSIL
425	'362232197612070024	others	LSIL
426	'362232196508040125	others	LSIL
427	'362232198004021626	others	LSIL
428	'362232197505011026	others	LSIL
429	'36223219771115002X	others	LSIL
430	'420802198009200027	others	LSIL
431	'362232197602192060	others	LSIL
432	'362232197211072024	others	LSIL
433	'362232196906090826	others	LSIL
434	'362232197308311823	others	LSIL
435	'362232196504040028	others	LSIL
436	'362232197910060844	others	LSIL
437	'36223219550907022X	others	LSIL
438	'511224197807088002	others	LSIL
439	'362232196507011220	others	LSIL
440	'362232197001152215	others	LSIL
441	'362232196309060021	others	LSIL
442	'362226196804050120	others	LSIL
443	'362232196608192040	others	LSIL
444	'362232196408121424	others	LSIL
445	'362232196907141825	others	LSIL
446	'362232197005081821	others	LSIL
447	'362232197208121627	others	LSIL
448	'362232196307261823	others	LSIL
449	'362232197608121829	others	LSIL
450	'362232197009221828	others	LSIL
451	'362232197511231829	others	LSIL
452	'362232197508092020	others	LSIL
453	'362232196412151829	others	LSIL
454	'362232195404041828	others	LSIL
455	'362232196402211824	others	LSIL
456	'36223219610621182X	others	LSIL
457	'362232197610062020	others	LSIL
458	'362232197908221821	others	LSIL
459	'360426197212102025	others	LSIL
460	'362232197108231829	others	LSIL
461	'362232197505022107	others	LSIL
462	'362232196312241827	others	LSIL
463	'362232196903052024	others	LSIL
464	'36223219680312182X	others	LSIL
465	'362232197305141822	others	LSIL
466	'362232196011051843	others	LSIL
467	'362232197509211925	others	LSIL
468	'362232196510101825	others	LSIL
469	'362232197304231826	others	LSIL
470	'362232196905141821	others	LSIL
471	'362232196810131823	others	LSIL
472	'362232196204141829	others	LSIL
473	'362232196005011845	others	LSIL
474	'362232195303271827	others	LSIL
475	'362232196801291825	others	LSIL
476	'362232198007292824	others	LSIL
477	'362232196305111821	others	LSIL
478	'362232196109171827	others	LSIL
479	'362232196007251826	others	LSIL
480	'36223219580709182X	others	LSIL
481	'362232197201171824	others	LSIL
482	'362232197508221822	others	LSIL
483	'420802198002070020	others	LSIL
484	'362232196909301845	others	LSIL
485	'362232195511161825	others	LSIL
486	'362232196504271828	others	LSIL
487	'362232196801081824	others	LSIL
488	'362232195912271822	others	LSIL
489	'362232197709221829	others	LSIL
490	'362232196108111822	others	LSIL
491	'362232196601081823	others	LSIL
492	'362232195509121824	others	LSIL
493	'362232195110161824	others	LSIL
494	'362232196301191827	others	LSIL
495	'362232197111171820	others	LSIL
496	'362232197502131826	others	LSIL
497	'362232197207281821	others	LSIL
498	'36223219651110186X	others	LSIL
499	'362232196909061829	others	LSIL
500	'362232196604281820	others	LSIL
501	'362232196207071826	others	LSIL
502	'362232196610051829	others	LSIL
503	'362232195302231823	others	LSIL
504	'362232197412251920	others	LSIL
505	'362232196702151827	others	LSIL
506	'36223219580610182X	others	LSIL
507	'362232197310221827	others	LSIL
508	'362232195812251824	others	LSIL
509	'362232197705291926	others	LSIL
510	'362232197601251620	others	LSIL
511	'362232197009251824	others	LSIL
512	'362232196011021820	others	LSIL
513	'362232197510271626	others	LSIL
514	'362232197206110329	others	LSIL
515	'362232195402011828	others	LSIL
516	'362232197003201826	others	LSIL
517	'36223219790909182X	others	LSIL
518	'362232197012062047	others	LSIL
519	'36223219570527182X	others	LSIL
520	'362232196304031221	others	LSIL
521	'430481198004196700	others	LSIL
522	'362232195301231821	others	LSIL
523	'362232195910011840	others	LSIL
524	'362232196611231821	others	LSIL
525	'362232196611191823	others	LSIL
526	'362232195903191820	others	LSIL
527	'362232195902201820	others	LSIL
528	'362232195505061828	others	LSIL
529	'362232196308121822	others	LSIL
530	'362232196608181827	others	LSIL
531	'362232196002081821	others	LSIL
532	'36223219750907182X	others	LSIL
533	'362232196604081829	others	LSIL
534	'362232196703061823	others	LSIL
535	'362232196803291829	others	LSIL
536	'362232197303021827	others	LSIL
537	'36223219590501182X	others	LSIL
538	'362232196411042022	others	LSIL
539	'362232196911021842	others	LSIL
540	'362232195310241829	others	LSIL
541	'36223219730623182X	others	LSIL
542	'360104197608111943	others	LSIL
543	'362232195406071828	others	LSIL
544	'362232196304011829	others	LSIL
545	'362232197709061829	others	LSIL
546	'362232197903102022	others	LSIL
547	'362232195412011821	others	LSIL
548	'362232197204061823	others	LSIL
549	'362232196801241828	others	LSIL
550	'362232195205011829	others	LSIL
551	'362232196410071825	others	LSIL
552	'362232197701161825	others	LSIL
553	'362232195910181823	others	LSIL
554	'362232196007271827	others	LSIL
555	'36223219600626182X	others	LSIL
556	'362232197808081825	others	LSIL
557	'362232196410081820	others	LSIL
558	'362232197812111628	others	LSIL
559	'362232197307301826	others	LSIL
560	'360104197901131986	others	LSIL
561	'362232197308271841	others	LSIL
562	'362232197506230063	others	LSIL
563	'362232196708031842	others	LSIL
564	'362232198001032023	others	LSIL
565	'362232196201041849	others	LSIL
566	'362232197709161248	others	LSIL
567	'362232198012030848	others	LSIL
568	'362232196603041825	others	LSIL
569	'362232197303161862	others	LSIL
570	'362232196512011823	others	LSIL
571	'362232196708141822	others	LSIL
572	'362232195804251824	others	LSIL
573	'362232197510021424	others	LSIL
574	'362232195311151825	others	LSIL
575	'362232196905032027	others	LSIL
576	'362232195801021820	others	LSIL
577	'362232197911241823	others	LSIL
578	'362232197009101826	others	LSIL
579	'362232196705271824	others	LSIL
580	'362232197610112024	others	LSIL
581	'362232196207261826	others	LSIL
582	'362232197008161827	others	LSIL
583	'362232196412271820	others	LSIL
584	'362232196503181820	others	LSIL
585	'362232197008291824	others	LSIL
586	'362232196312251822	others	LSIL
587	'362232196909051823	others	LSIL
588	'36223219591125182X	others	LSIL
589	'362232195605071847	others	LSIL
590	'362232196008271829	others	LSIL
591	'362232195610072027	others	LSIL
592	'36223219571204182X	others	LSIL
593	'362232197512141841	others	LSIL
594	'362232195405091827	others	LSIL
595	'362232195904091821	others	LSIL
596	'36223219581226182X	others	LSIL
597	'362232195510171829	others	LSIL
598	'362232196409231828	others	LSIL
599	'362232196311081825	others	LSIL
600	'362232196908010026	others	LSIL
601	'362232196512271828	others	LSIL
602	'362232196305301828	others	LSIL
603	'362232197202101668	others	LSIL
604	'362232197708301827	others	LSIL
605	'362232196406041826	others	LSIL
606	'362232195711111822	others	LSIL
607	'36223219680224182X	others	LSIL
608	'36223219560812182X	others	LSIL
609	'362232196904011822	others	LSIL
610	'36223219540213182X	others	LSIL
611	'360426197502272022	others	LSIL
612	'362232197503271820	others	LSIL
613	'362232196304291824	others	LSIL
614	'362232196607051828	others	LSIL
615	'362232198001201640	others	LSIL
616	'36223219730410182X	others	LSIL
617	'362232195711181820	others	LSIL
618	'362232195810241825	others	LSIL
619	'362232196806231821	others	LSIL
620	'362232195401121822	others	LSIL
621	'362232196302041821	others	LSIL
622	'362232196711261825	others	LSIL
623	'362232197105301828	others	LSIL
624	'362232196809121822	others	LSIL
625	'36223219710419184X	others	LSIL
626	'362232196110161829	others	LSIL
627	'362232195608021829	others	LSIL
628	'362232197806071826	others	LSIL
629	'362232196510111847	others	LSIL
630	'362232197701021822	others	LSIL
631	'362232196905042022	others	LSIL
632	'362232196809241822	others	LSIL
633	'362232195809201826	others	LSIL
634	'362232196207221824	others	LSIL
635	'362232196302151828	others	LSIL
636	'362232196510121826	others	LSIL
637	'362232196309141825	others	LSIL
638	'36223219580311182X	others	LSIL
639	'362232197404011425	others	LSIL
640	'362232196501301825	others	LSIL
641	'362232197009232420	others	LSIL
642	'362226197306062723	others	LSIL
643	'362232197404161722	others	LSIL
644	'362232197407242024	others	LSIL
645	'362232197303312022	others	LSIL
646	'362232196106050827	others	LSIL
647	'362232197601291921	others	LSIL
648	'362232196909092022	others	LSIL
649	'362232197407100624	others	LSIL
650	'362232196410060229	others	LSIL
651	'362232197601250628	others	LSIL
652	'500101198010241628	others	LSIL
653	'362232197211272024	others	LSIL
654	'362232197604240425	others	LSIL
655	'362232197611111226	others	LSIL
656	'362226198009293043	others	LSIL
657	'362232196901051247	others	LSIL
658	'362232197202150160	others	LSIL
659	'362232195609120124	others	LSIL
660	'362232197010052022	others	LSIL
661	'362232195909240048	others	LSIL
662	'362232198012120623	others	LSIL
663	'362232196101172024	others	LSIL
664	'362232195907211923	others	LSIL
665	'362232196707201061	others	LSIL
666	'362232198003230424	others	LSIL
667	'362232196606122102	others	LSIL
668	'362232197312020025	others	LSIL
669	'362232197611100025	others	LSIL
670	'362232197012042222	others	LSIL
671	'362232197208090242	others	LSIL
672	'962232197404160041	others	LSIL
673	'362229197402120224	others	LSIL
674	'36223219800228124X	others	LSIL
675	'362232197505120024	others	LSIL
676	'36223219681223122X	others	LSIL
677	'362232198009301426	others	LSIL
678	'362232196703152223	others	LSIL
679	'362232196708280824	others	LSIL
680	'362232195606250025	others	LSIL
681	'362232197204212204	others	LSIL
682	'362232197803130827	others	LSIL
683	'362232196510310125	others	LSIL
684	'36223219721023142X	others	LSIL
685	'362232196509191623	others	LSIL
686	'362226198012242029	others	LSIL
687	'362232198004070242	others	LSIL
688	'362232198008211923	others	LSIL
689	'362232195812120425	others	LSIL
690	'362232197403030229	others	LSIL
691	'362232197302062342	others	LSIL
692	'362204197610116521	others	LSIL
693	'362232196602141226	others	LSIL
694	'362232196701201220	others	LSIL
695	'362232197508130023	others	LSIL
696	'362232195808082342	others	LSIL
697	'362232196310171242	others	LSIL
698	'362232196611180841	others	LSIL
699	'362232198001312422	others	LSIL
700	'362232197410091222	others	LSIL
701	'362232196606064225	others	LSIL
702	'362226198002120622	others	LSIL
703	'362232197812250024	others	LSIL
704	'362232197702230829	others	LSIL
705	'362232195601280027	others	LSIL
706	'362232196807060024	others	LSIL
707	'36223219800101124X	others	LSIL
708	'362232197601020064	others	LSIL
709	'362232197510150442	others	LSIL
710	'36223219800817006X	others	LSIL
711	'362232196310250025	others	LSIL
712	'362232196804111228	others	LSIL
713	'362232195306160625	others	LSIL
714	'362232197407280026	others	LSIL
715	'362232195807120026	others	LSIL
716	'362232198007010046	others	LSIL
717	'362232197002170423	others	LSIL
718	'362232198004060825	others	LSIL
719	'362427198007180029	others	LSIL
720	'362232198005070026	others	LSIL
721	'362232198003190049	others	LSIL
722	'362232195104011246	others	LSIL
723	'36223219660730002X	others	LSIL
724	'36223219800212102X	others	LSIL
725	'362232197503120045	others	LSIL
726	'362232197605140620	others	LSIL
727	'362232196706300121	others	LSIL
728	'362232197511060620	others	LSIL
729	'362232198010210021	others	LSIL
730	'362232196204120024	others	LSIL
731	'362232197401210620	others	LSIL
732	'360430197507260025	others	LSIL
733	'362232198003060620	others	LSIL
734	'362226197909010623	others	LSIL
735	'362232196403180023	others	LSIL
736	'362232197901271236	others	LSIL
737	'362232198010180626	others	LSIL
738	'362232197304141425	others	LSIL
739	'362232198009190028	others	LSIL
740	'362232197110250625	others	LSIL
741	'362226196809260620	others	LSIL
742	'362232196011191256	others	LSIL
743	'362232197410270025	others	LSIL
744	'362232196806192623	others	LSIL
745	'362232197712252423	others	LSIL
746	'362232196808111225	others	LSIL
747	'362226197303020640	others	LSIL
748	'36223219581230204X	others	LSIL
749	'362232197002040640	others	LSIL
750	'362232195701060021	others	LSIL
751	'362232197307040626	others	LSIL
752	'36223219721015142X	others	LSIL
753	'362232197103141042	others	LSIL
754	'362232197807020027	others	LSIL
755	'362232197104041227	others	LSIL
756	'362232198007111229	others	LSIL
757	'362232196209060024	others	LSIL
758	'362232197404266142	others	LSIL
759	'362232197411100821	others	LSIL
760	'362232197312300628	others	LSIL
761	'362232195112131622	others	LSIL
762	'362232197307152342	others	LSIL
763	'220221197610156543	others	LSIL
764	'362232197212180021	others	LSIL
765	'362232197211111227	others	LSIL
766	'362232197605220621	others	LSIL
767	'362232196301030020	others	LSIL
768	'36223219511109002X	others	LSIL
769	'362232196006080826	others	LSIL
770	'362232197007181826	others	LSIL
771	'362232195805080027	others	LSIL
772	'362232197804282246	others	LSIL
773	'362232195406120108	others	LSIL
774	'362232198002180221	others	LSIL
775	'36223219800422446X	others	LSIL
776	'362232197404260042	others	LSIL
777	'342529198011061826	others	LSIL
778	'36223219800818052X	others	LSIL
779	'362232197310300023	others	LSIL
780	'362232197508090041	others	LSIL
781	'360124198010134240	others	LSIL
782	'362232197309132024	others	LSIL
783	'36223219730303082X	others	LSIL
784	'362232197107210049	others	LSIL
785	'362226195710294826	others	LSIL
786	'362232198010250026	others	LSIL
787	'36223219800411012X	others	LSIL
788	'362232198010281229	others	LSIL
789	'362232197208050021	others	LSIL
790	'362232196501042422	others	LSIL
791	'362232196609260025	others	LSIL
792	'362232197306230042	others	LSIL
793	'362232197510171342	others	LSIL
794	'362232196808050047	others	LSIL
795	'362232196708172024	others	LSIL
796	'362232196810230645	others	LSIL
797	'362232196102262027	others	LSIL
798	'362232197703211224	others	LSIL
799	'362232197112110026	others	LSIL
800	'362232197702170221	others	LSIL
801	'362232195311200127	others	LSIL
802	'362232195902282026	others	LSIL
803	'362232197901022024	others	LSIL
804	'362232197404240041	others	LSIL
805	'362232198011081421	others	LSIL
806	'36223219770211848X	others	LSIL
807	'362232195608162250	others	LSIL
808	'362232198011241424	others	LSIL
809	'362232197011220023	others	LSIL
810	'362226197902203621	others	LSIL
811	'36223219740123122X	others	LSIL
812	'362232195707280029	others	LSIL
813	'362232196210250028	others	LSIL
814	'362232195909190044	others	LSIL
815	'362232196912020825	others	LSIL
816	'362232197208022426	others	LSIL
817	'362232195804012926	others	LSIL
818	'362232196709202447	others	LSIL
819	'362232196709050946	others	LSIL
820	'362232197002030228	others	LSIL
821	'362232196304250029	others	LSIL
822	'362232196410240620	others	LSIL
823	'362232198008081220	others	LSIL
824	'362232196905130022	others	LSIL
825	'362232196902200021	others	LSIL
826	'36223219640907202X	others	LSIL
827	'360101198011266026	others	LSIL
828	'362232197006081924	others	LSIL
829	'362232197610180644	others	LSIL
830	'362232196203280024	others	LSIL
831	'362226197007170028	others	LSIL
832	'362232197501281240	others	LSIL
833	'362232197712290825	others	LSIL
834	'362226197903230446	others	LSIL
835	'362232197410140821	others	LSIL
836	'362226196805290646	others	LSIL
837	'362232195110170028	others	LSIL
838	'362232197211292427	others	LSIL
839	'362232197505070424	others	LSIL
840	'362232197606251427	others	LSIL
841	'362232197907150423	others	LSIL
842	'362232197602010423	others	LSIL
843	'432924197609151268	others	LSIL
844	'362232197401010021	others	LSIL
845	'362232197811260429	others	LSIL
846	'362232197404070029	others	LSIL
847	'362232196809274628	others	LSIL
848	'362232197011140023	others	LSIL
849	'362232196511261228	others	LSIL
850	'362232196807110220	others	LSIL
851	'362232196908030826	others	LSIL
852	'362232198010046229	others	LSIL
853	'36223219751214142X	others	LSIL
854	'362232198012100024	others	LSIL
855	'36223219750425060X	others	LSIL
856	'362232197101030602	others	LSIL
857	'362232196402210020	others	LSIL
858	'362204198008185768	others	LSIL
859	'362232198001292225	others	LSIL
860	'362232198101180429	others	LSIL
861	'362232198010291221	others	LSIL
862	'362232196608210042	others	LSIL
863	'362232198009072024	others	LSIL
864	'362232198011280024	others	LSIL
865	'362232197009071428	others	LSIL
866	'362232196212310020	others	LSIL
867	'362232196909182022	others	LSIL
868	'362232197207151429	others	LSIL
869	'362232196410290024	others	LSIL
870	'362232197305262229	others	LSIL
871	'362232196309230043	others	LSIL
872	'362232198001041249	others	LSIL
873	'362232196704041429	others	LSIL
874	'362232198012230825	others	LSIL
875	'36223219790211082X	others	LSIL
876	'362232195108202025	others	LSIL
877	'362232196911241423	others	LSIL
878	'322232197607280027	others	LSIL
879	'360104197611171981	others	LSIL
880	'362232195805060021	others	LSIL
881	'362232196802190229	others	LSIL
882	'362232197512122624	others	LSIL
883	'362232197411270222	others	LSIL
884	'36223219800417064X	others	LSIL
885	'36222619750728244X	others	LSIL
886	'362232197009151236	others	LSIL
887	'362232196105271222	others	LSIL
888	'36222619800728064X	others	LSIL
889	'362232197910020041	others	LSIL
890	'362226197609170641	others	LSIL
891	'36223219700627262X	others	LSIL
892	'362232198003111222	others	LSIL
893	'362232197211221626	others	LSIL
894	'362232197003040126	others	LSIL
895	'362232196305020129	others	LSIL
896	'362232197001200026	others	LSIL
897	'362232196908060824	others	LSIL
898	'362232197210201024	others	LSIL
899	'362232196310300028	others	LSIL
900	'362232197112070423	others	LSIL
901	'362232197208020423	others	LSIL
902	'362226197406300629	others	LSIL
903	'362232197305060846	others	LSIL
904	'362232198002151021	others	LSIL
905	'362232196605060042	others	LSIL
906	'362232198011201248	others	LSIL
907	'500235198002081264	others	LSIL
908	'362232197309250022	others	LSIL
909	'362232198002200227	others	LSIL
910	'362232196609010026	others	LSIL
911	'362232198009270025	others	LSIL
912	'362229198006111229	others	LSIL
913	'36223219700501002X	others	LSIL
914	'362232195610100026	others	LSIL
915	'362232198009020060	others	LSIL
916	'362232195508110822	others	LSIL
917	'362232196512190825	others	LSIL
918	'362232196411280020	others	LSIL
919	'362232197901300041	others	LSIL
920	'362232196912240043	others	LSIL
921	'362232197510240141	others	LSIL
922	'362232195807130120	others	LSIL
923	'362232196402210020	others	LSIL
1	'362232197102042226	others	HSIL+
2	'362232195412151242	others	HSIL+
3	'36223219550325062X	others	HSIL+
4	'362232196311160048	others	HSIL+
5	'362232197003080622	others	HSIL+
6	'362232195904020628	others	HSIL+
7	'362232197909090624	others	HSIL+
8	'362232196808010627	others	HSIL+
9	'362232196201030621	others	SCC
10	'362232197811290628	others	SCC
